# Supplementary material
Source: publisher figshare collection journal article supplement (https://diabetesjournals.figshare.com/articles/dataset/_/27233946)

Supplementary Files

Plots for Coloc analysis

Source: Karsten Suhre, et al  
2hGlu\_VWF

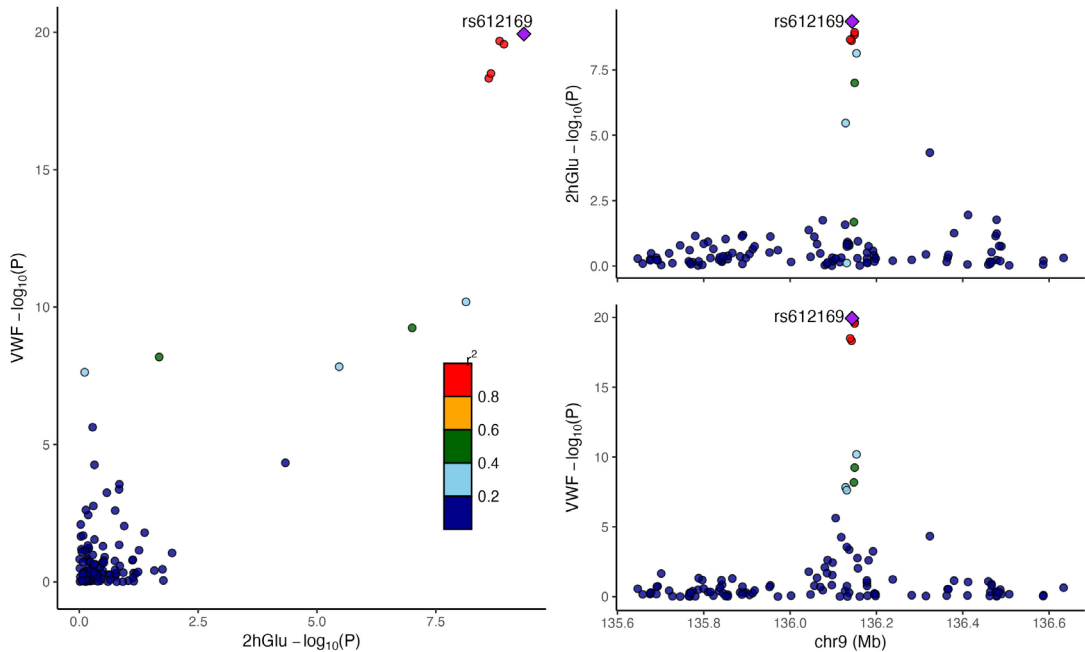

FG\_MST1

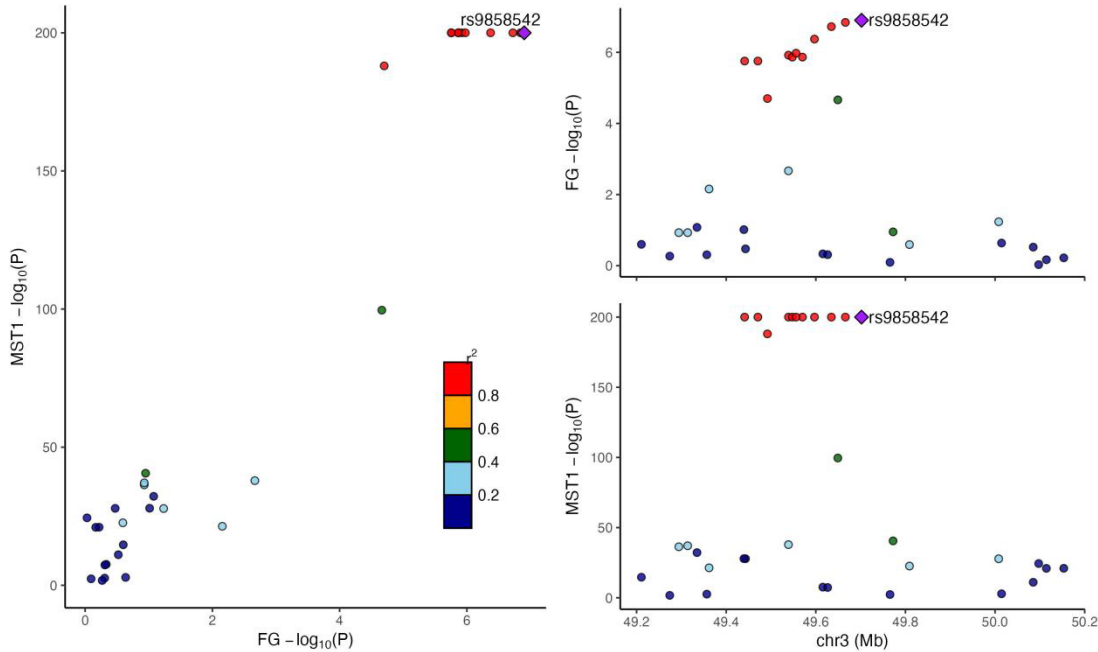



## HbA1c\_CD33

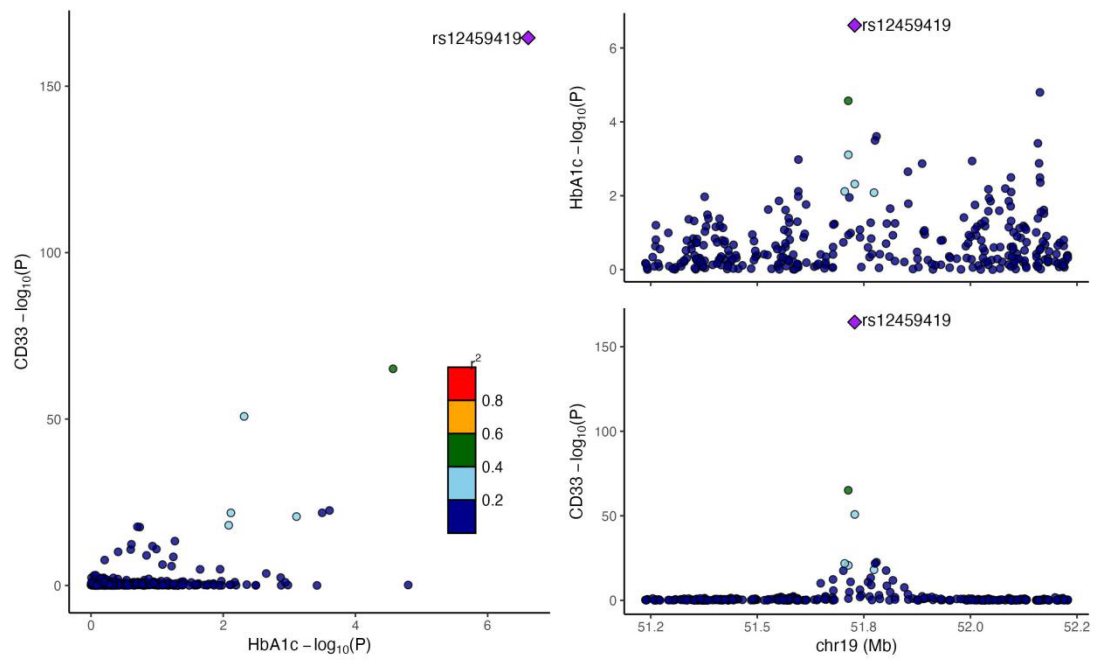

## Source: Alexander Gudjonsson, et al 2hGlu\_GNS

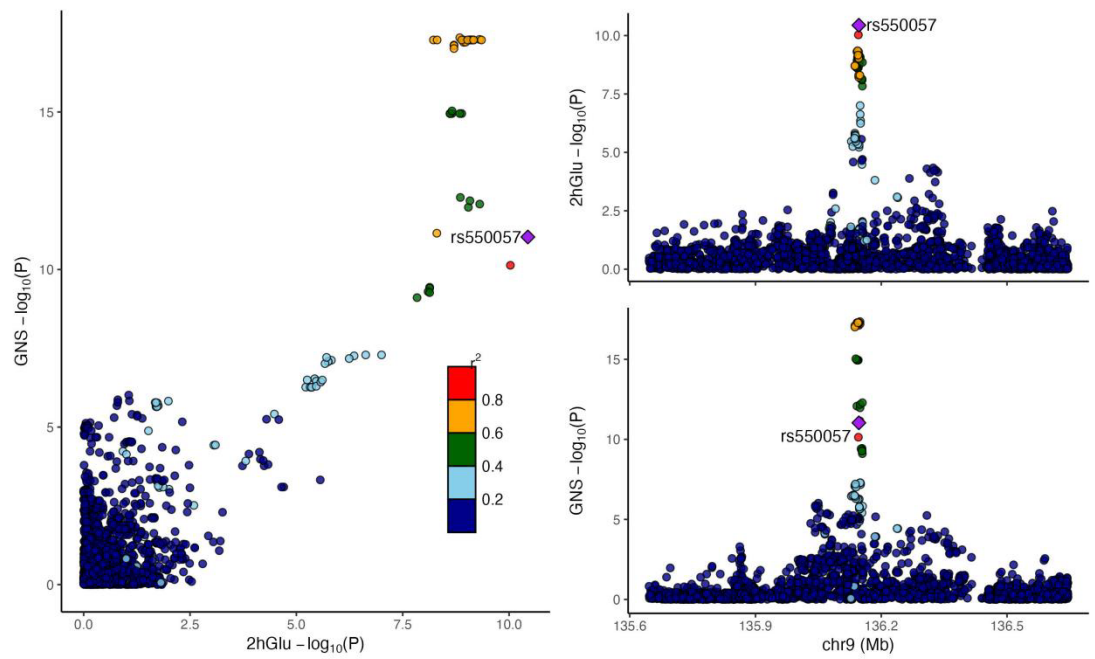



## 2hGlu\_PNPLA2

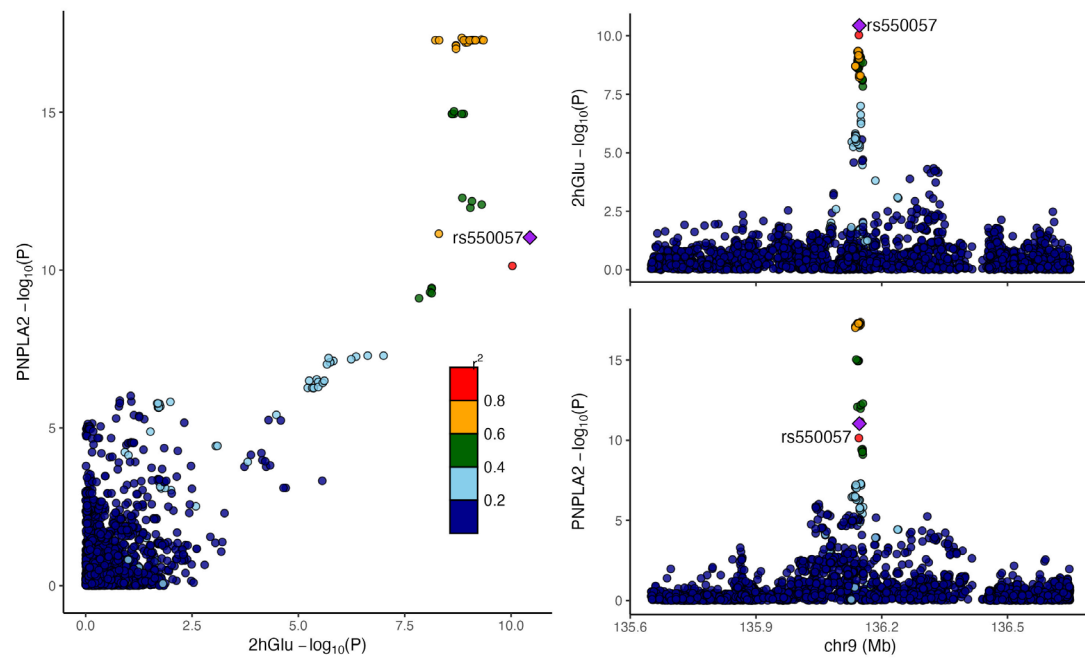

## FG\_FASLG

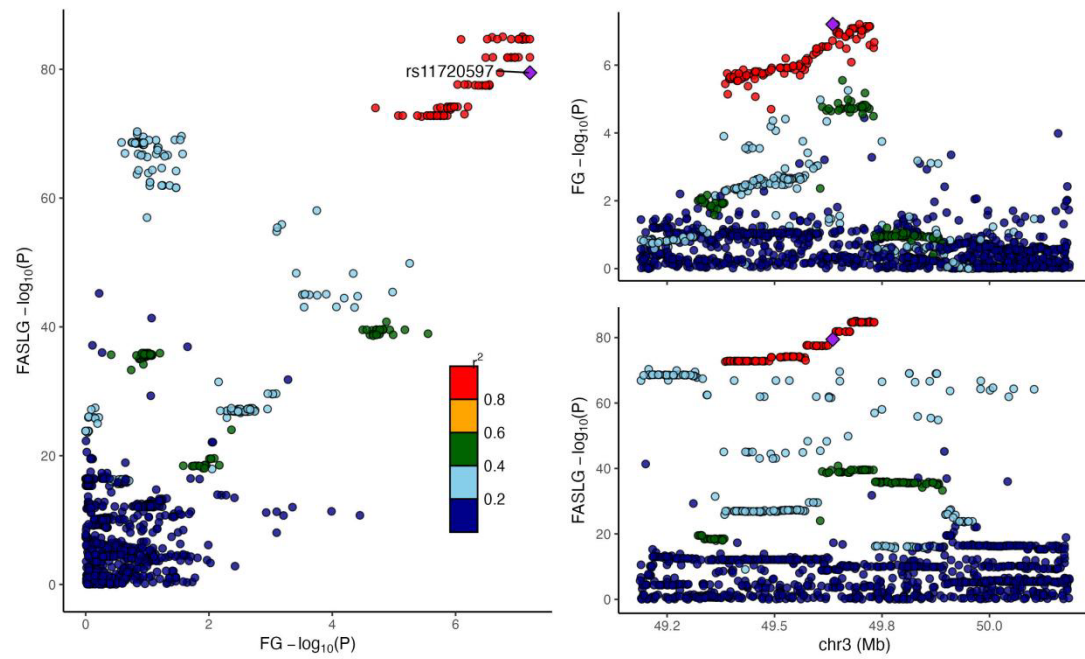



## HbA1c\_CD33

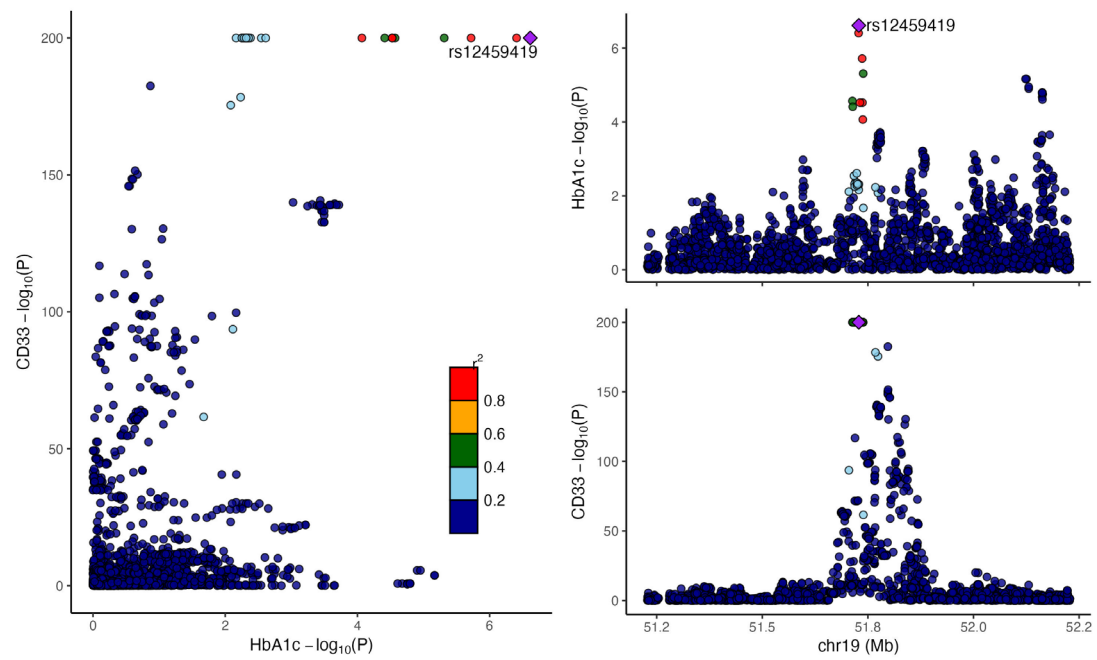

## FG\_SULF2

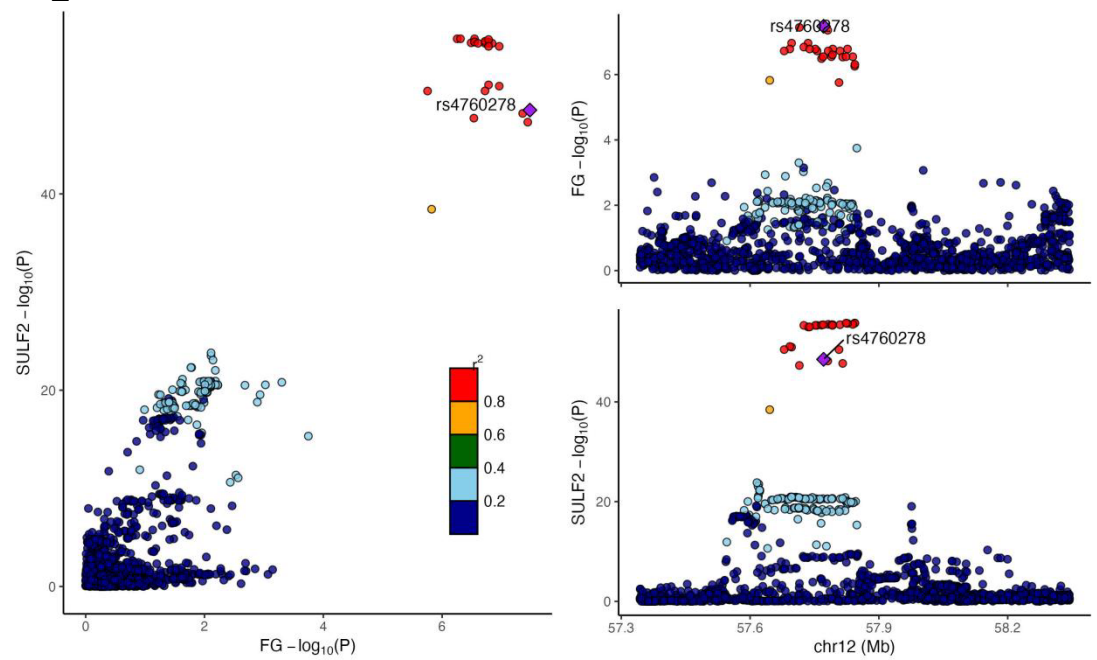



## FI\_HHIP

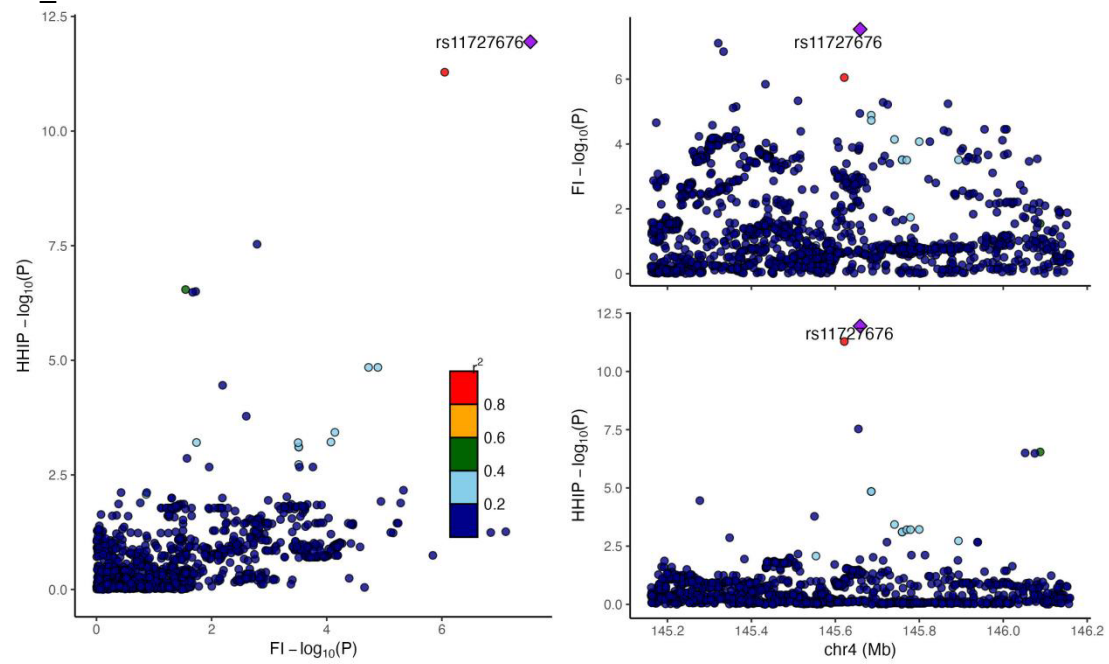

## FI\_RSPO3

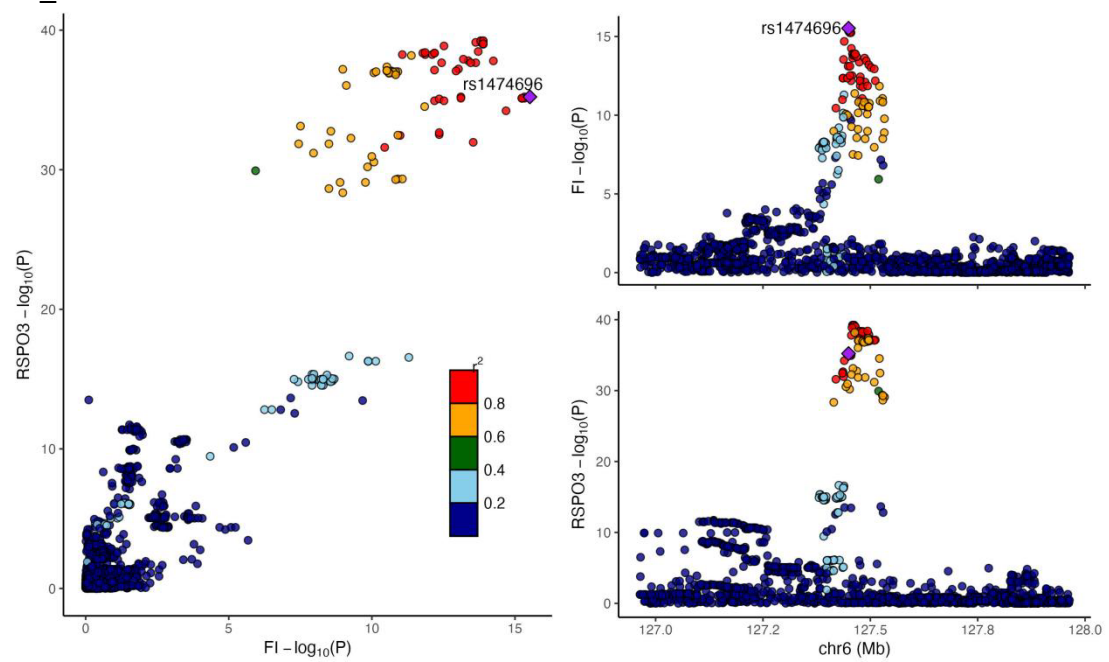



## HbA1c\_ATP1B2

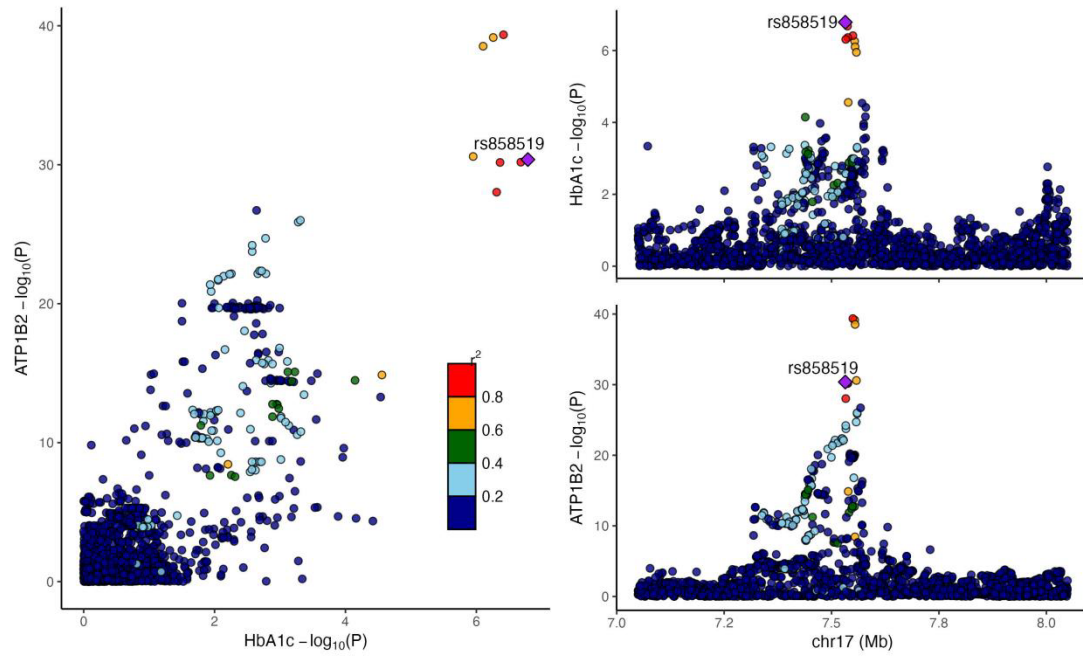

## HbA1c\_EPO

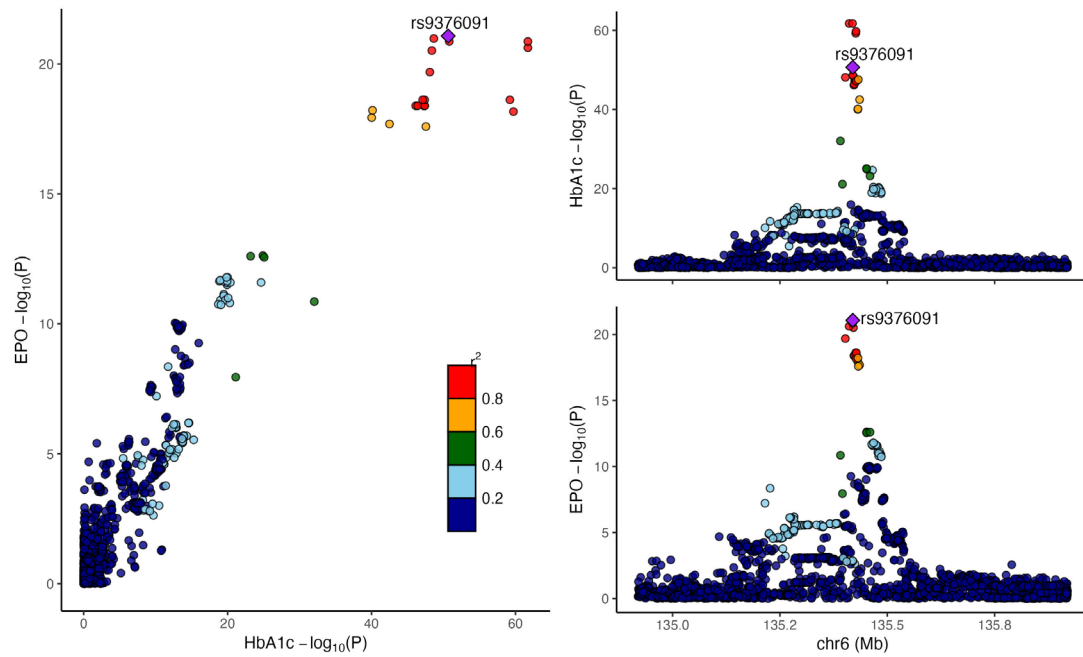



## HbA1c\_GNS

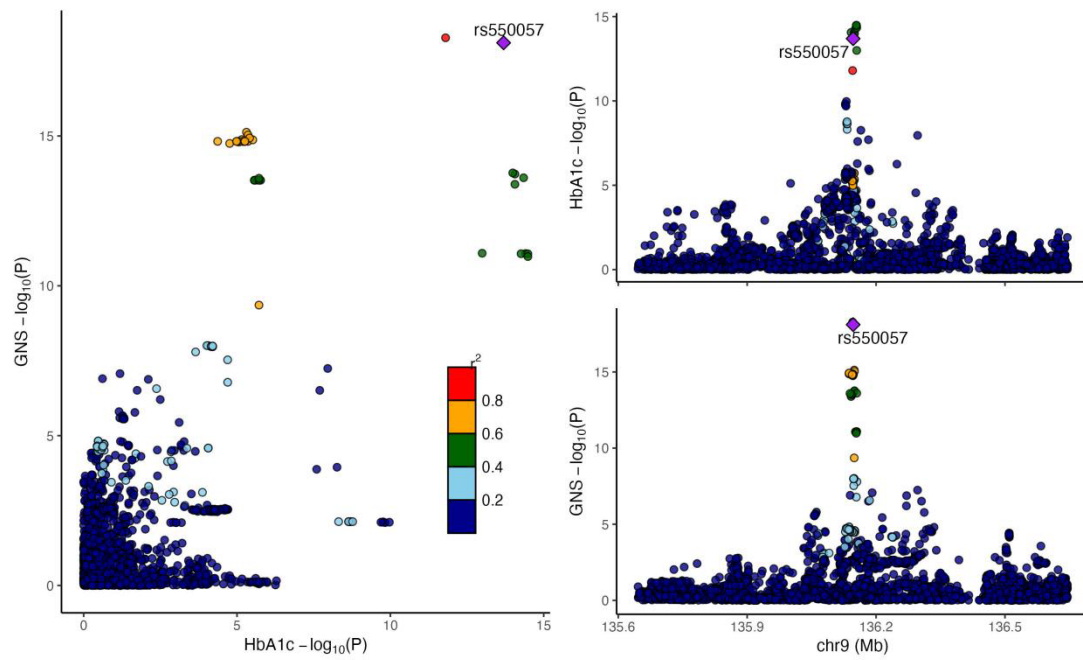

## HbA1c\_PDCD5

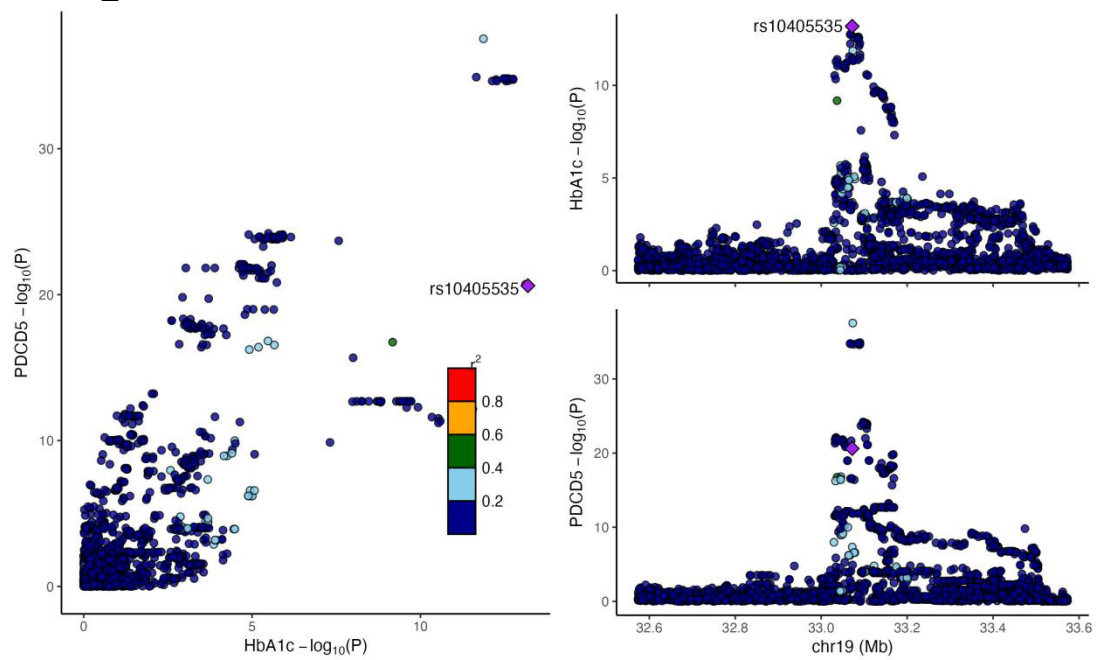



## HbA1c\_PFDN5

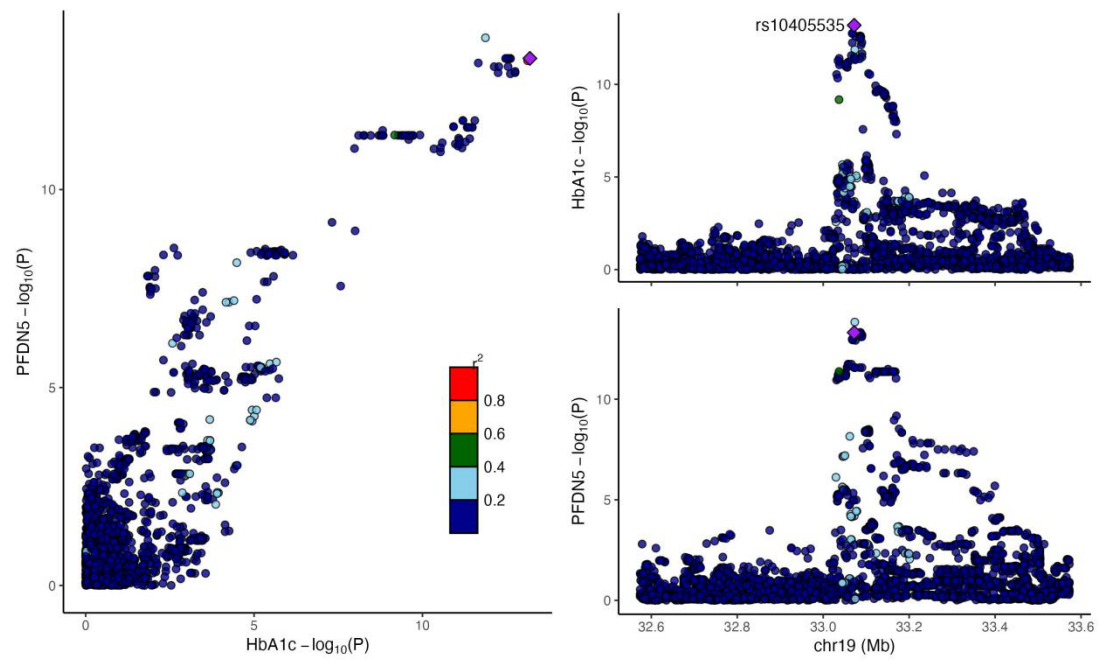

## HbA1c\_SWAP70

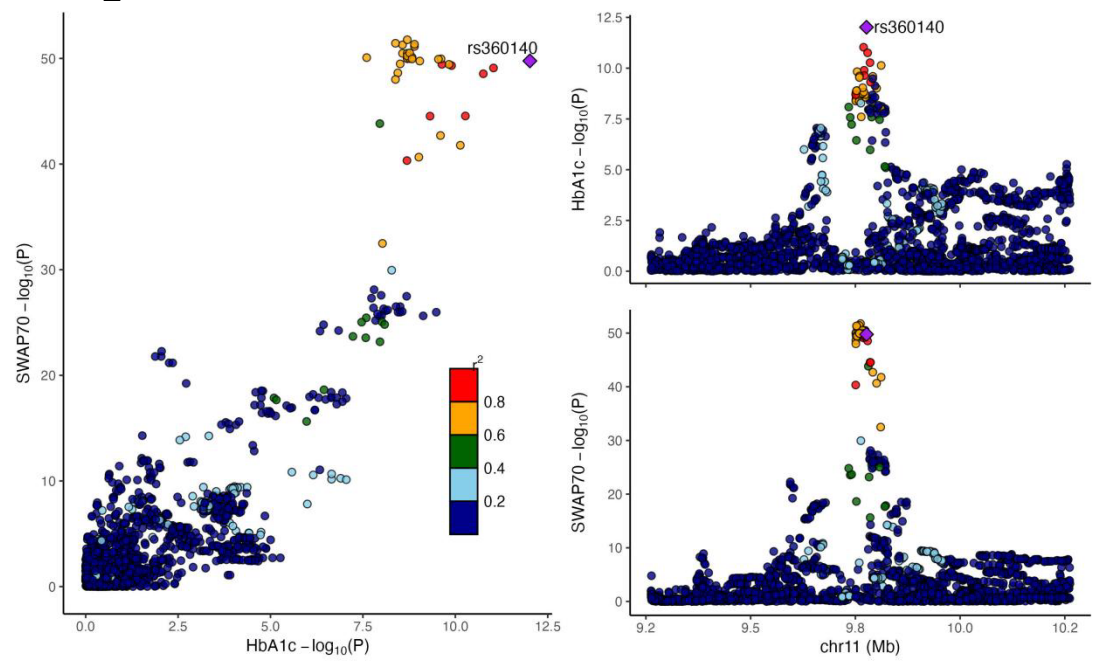



Source: Benjamin B. Sun, et al 2018

## 2hGlu\_CD209

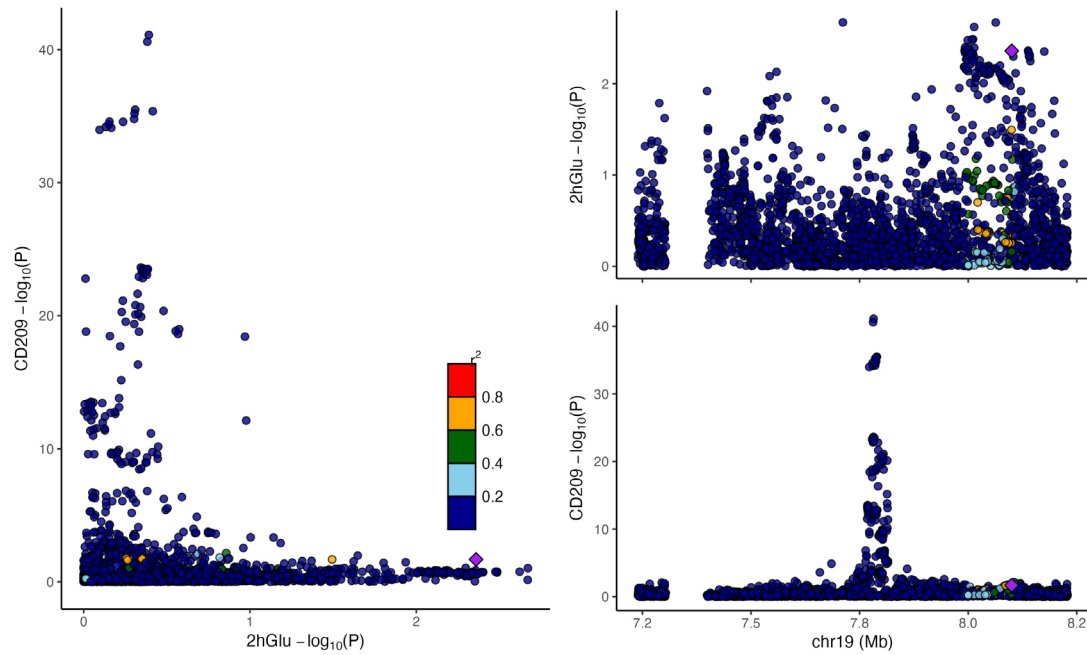

## FG\_ADH1B

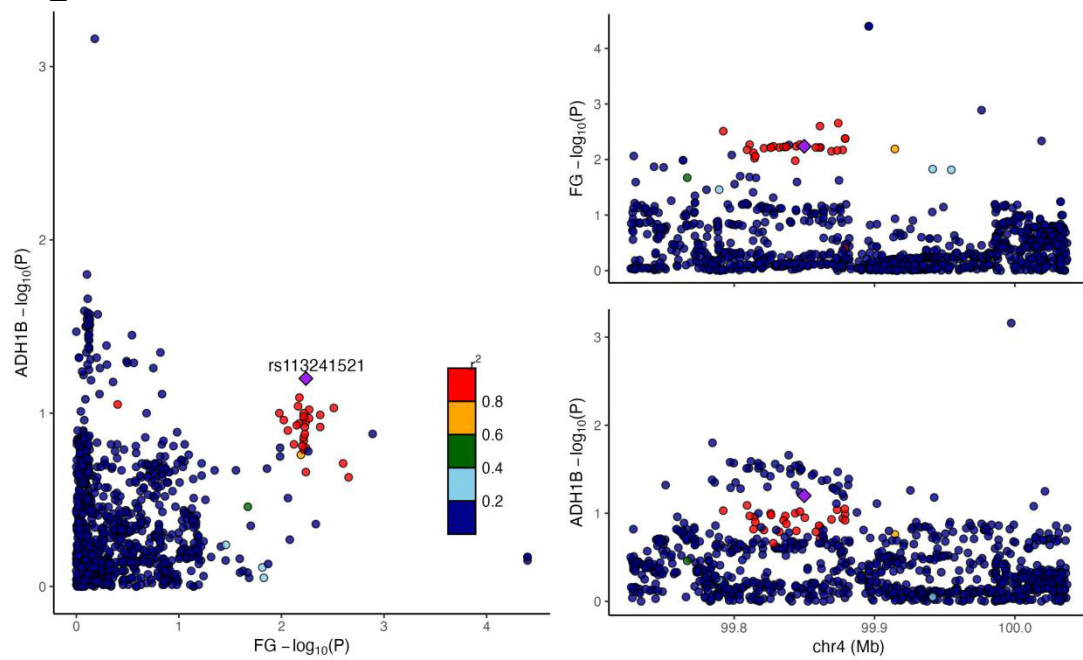



FG\_PRDM1

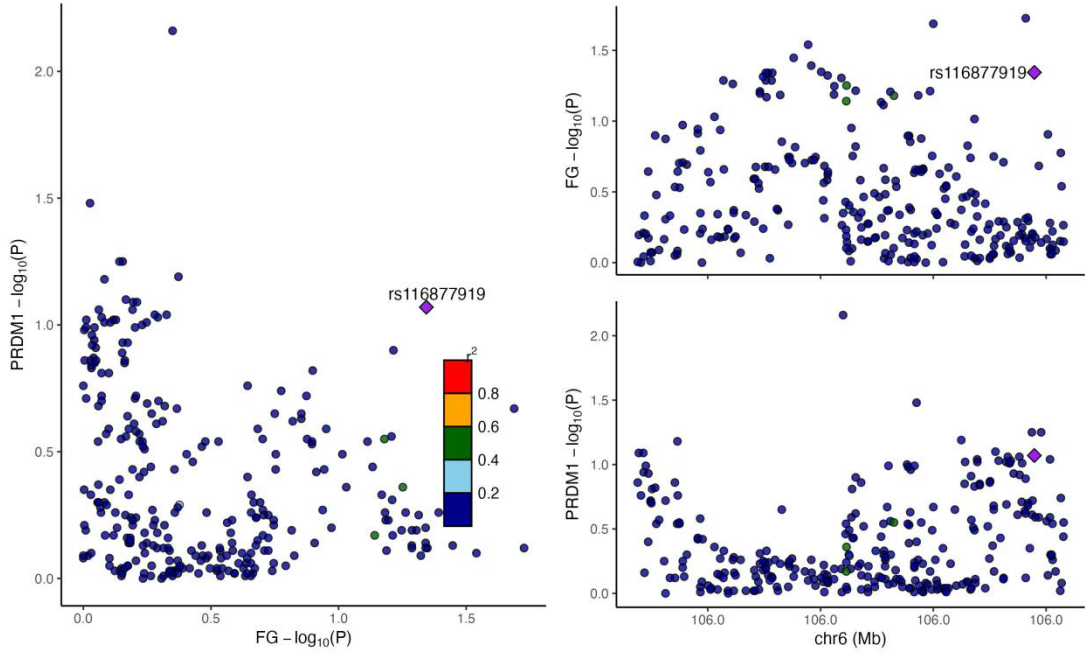

FI\_BCAM

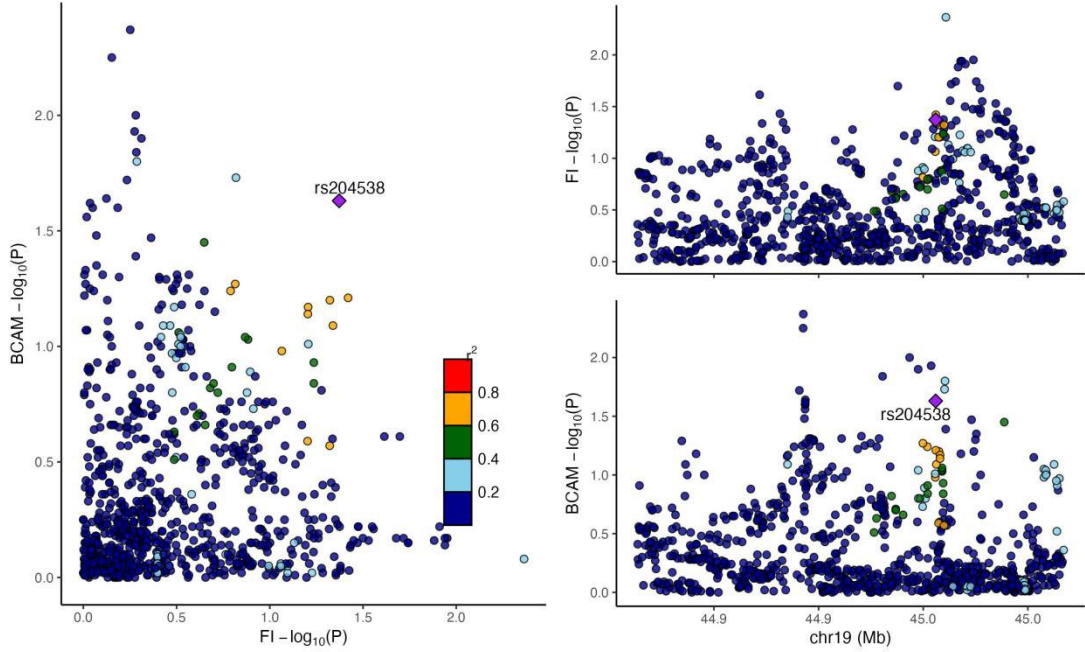



## FI\_CD36

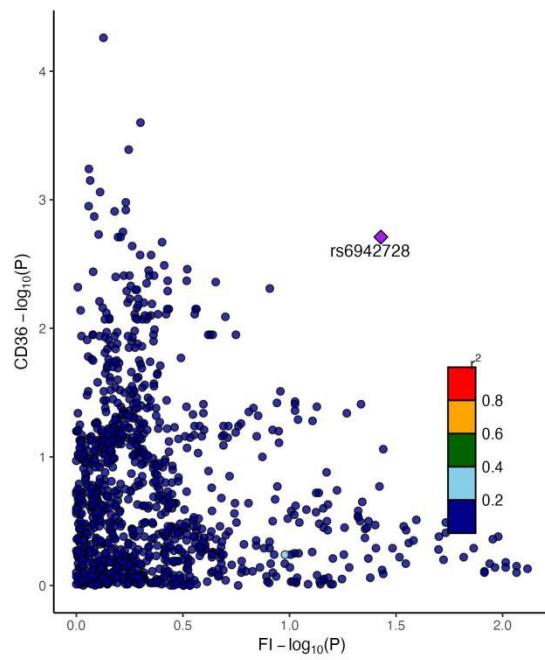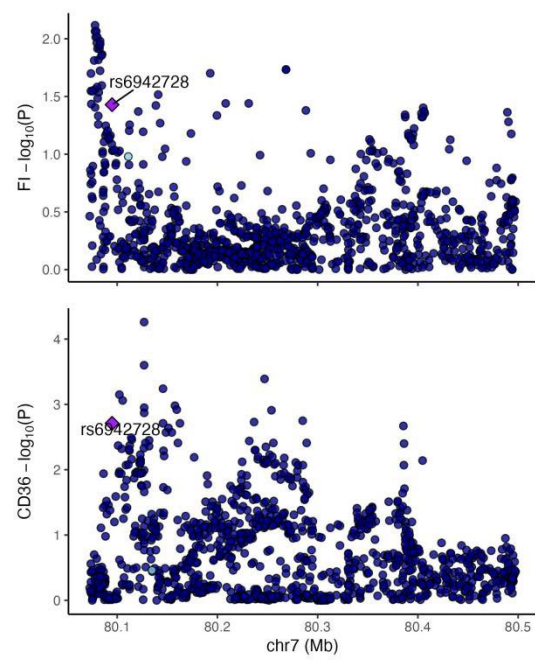

## FI\_CDH5

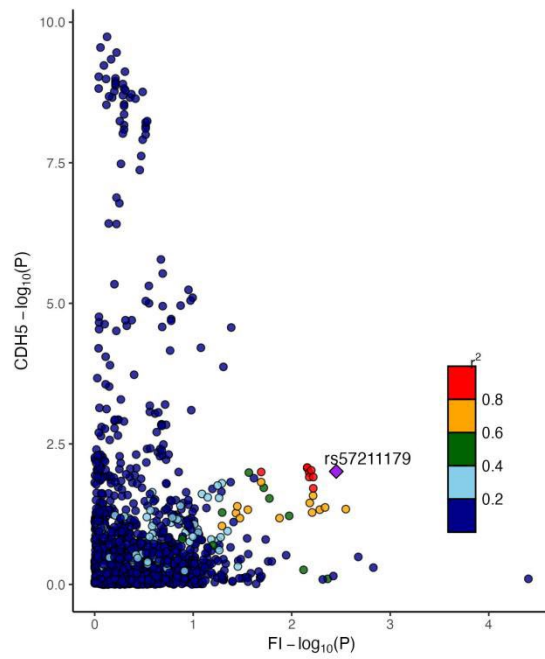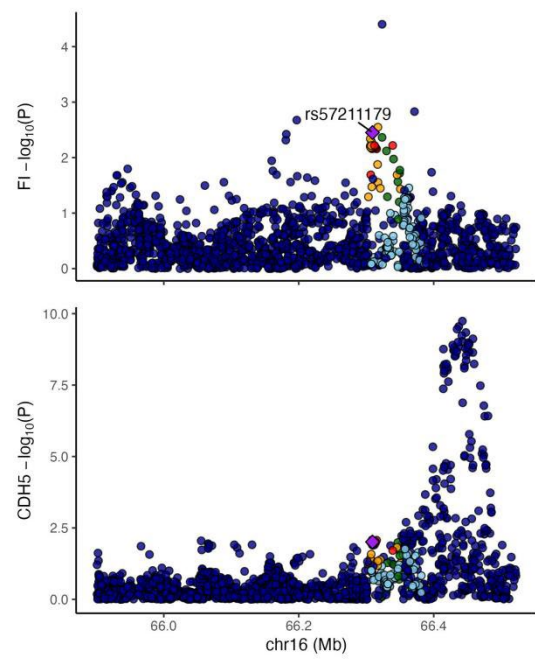



## FI\_RSPO3

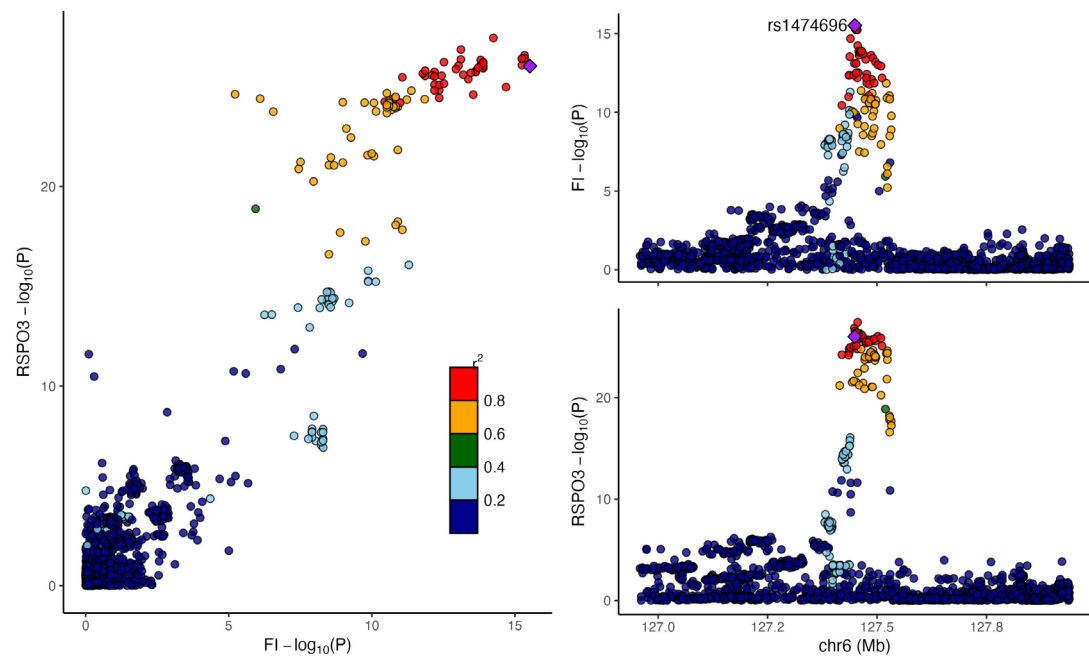

## HbA1c\_ARFIP1

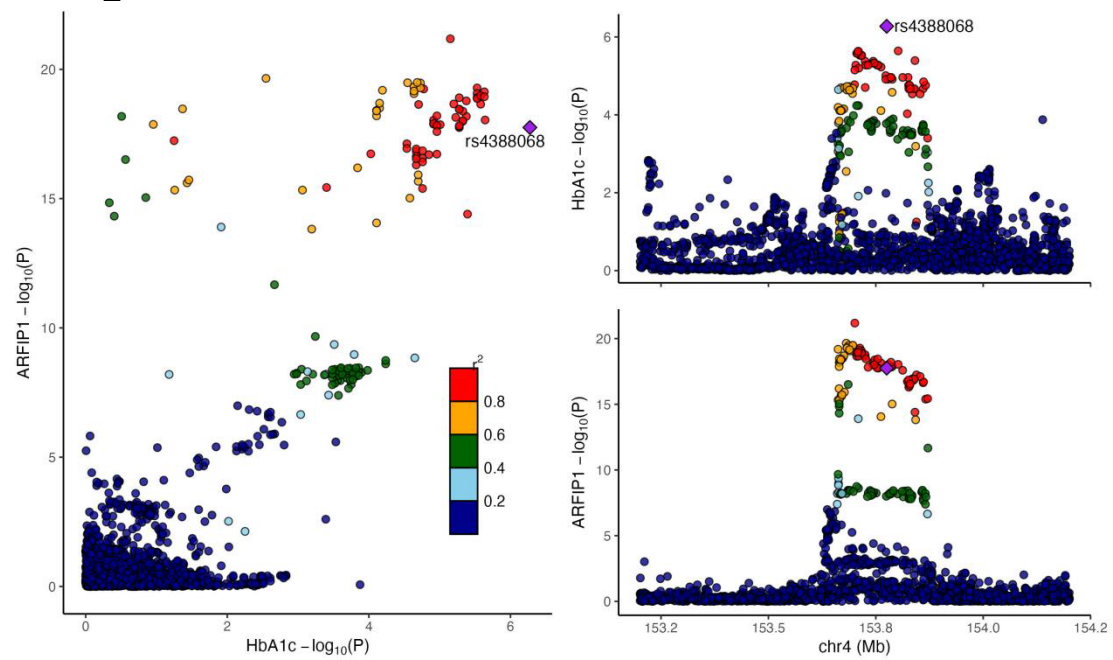



## HbA1c\_ATP1B2

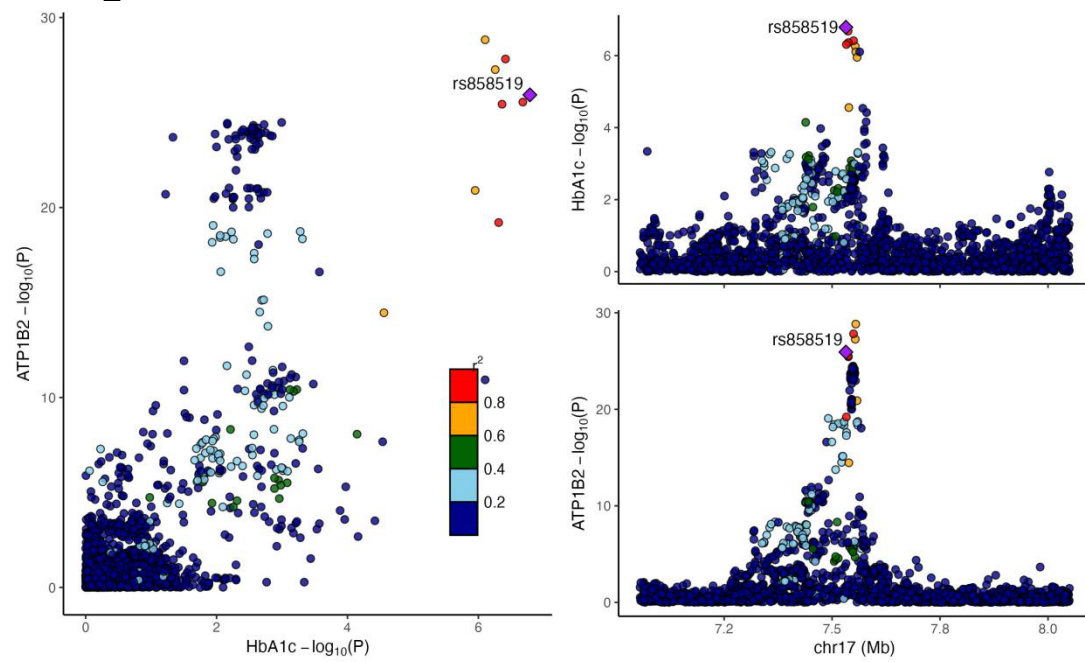

## HbA1c\_EGF

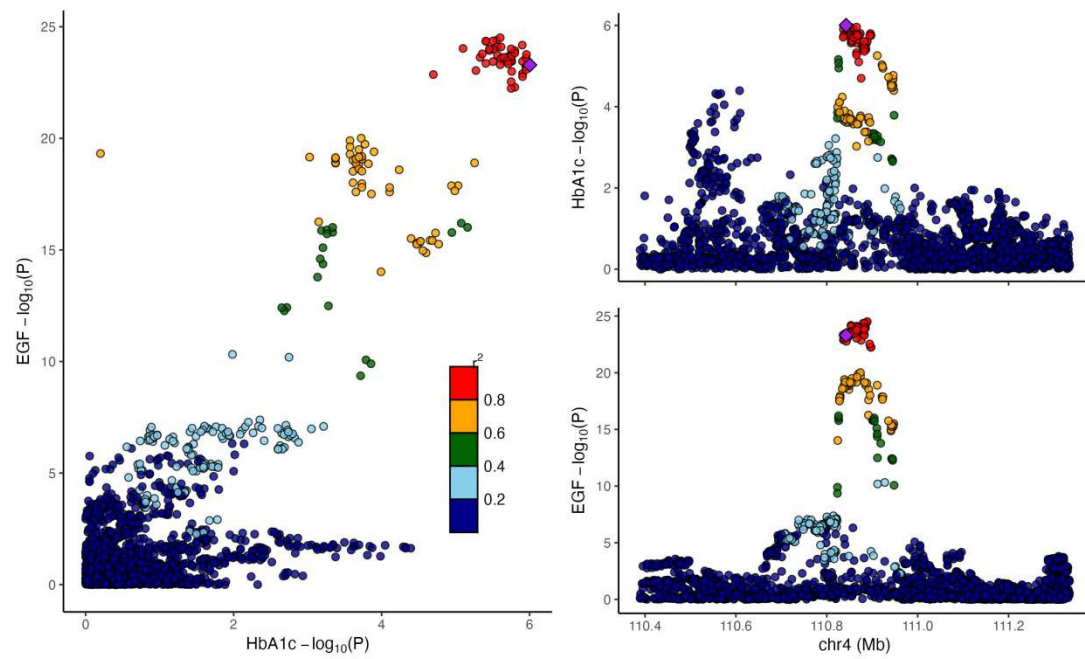



## HbA1c\_PDCD5

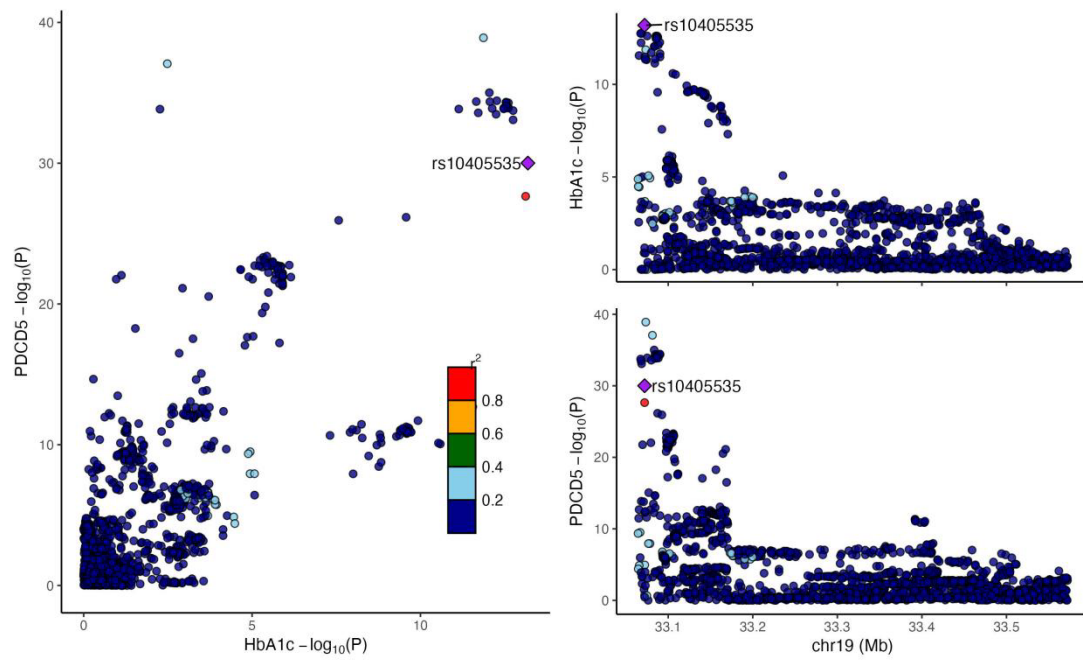

## HbA1c\_SWAP70

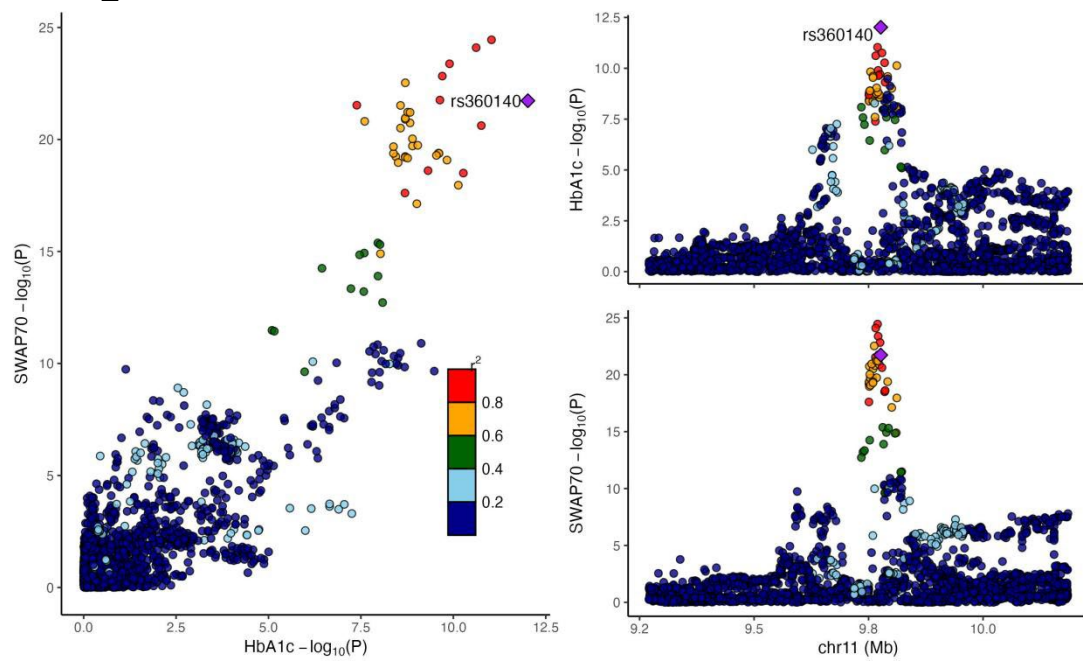



Source: Egil Ferkingstad, et al

2hGlu\_CES1

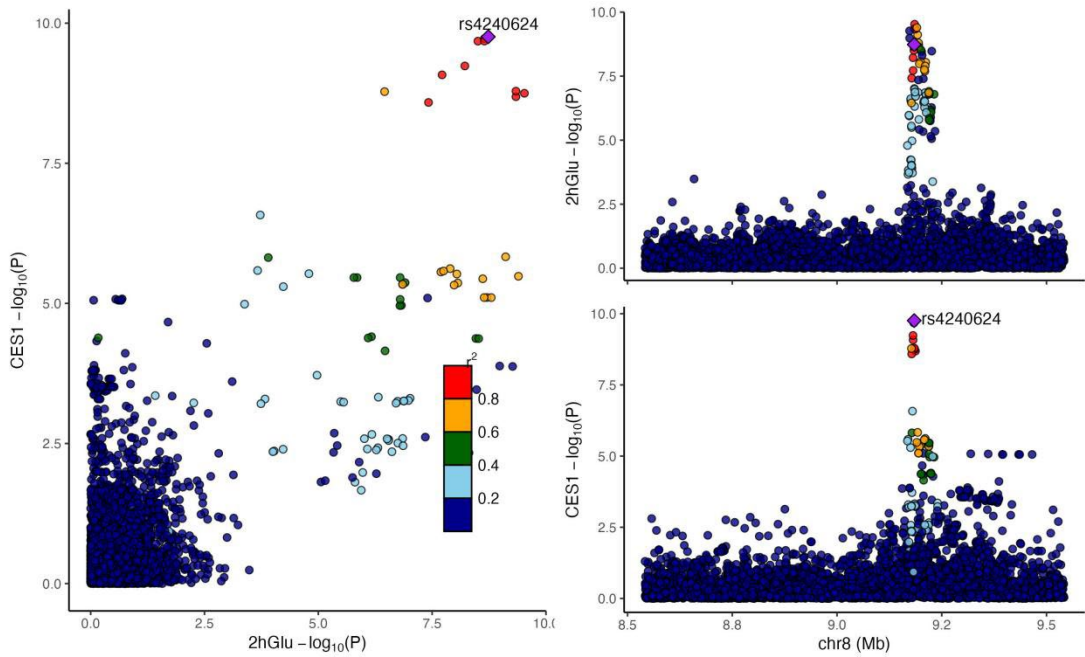

FG\_ARL2

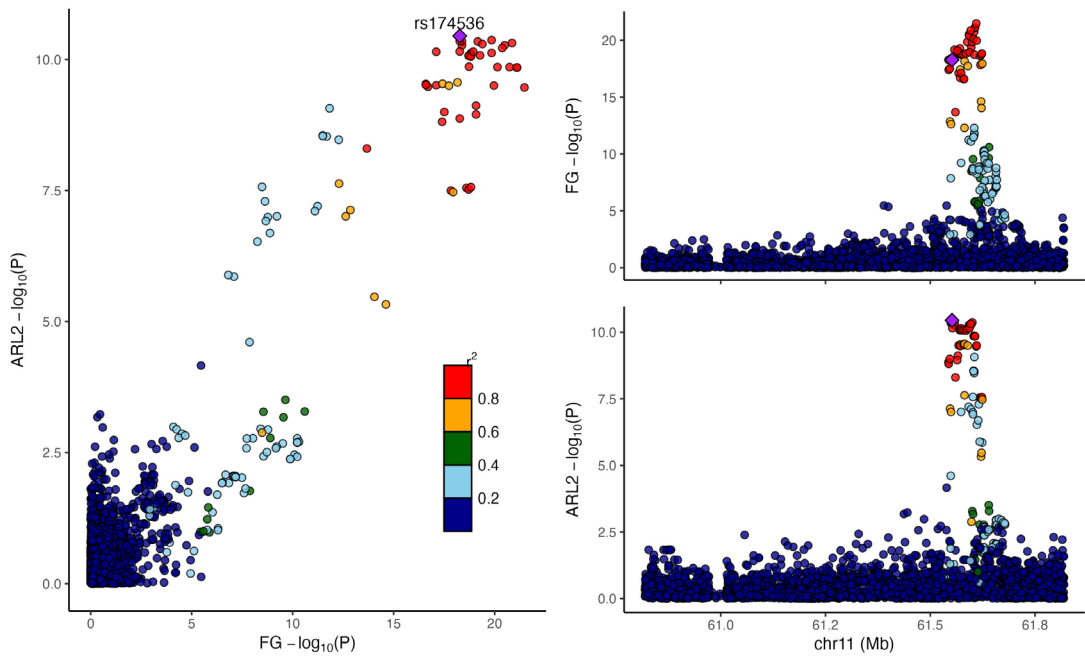



## FG\_CES1

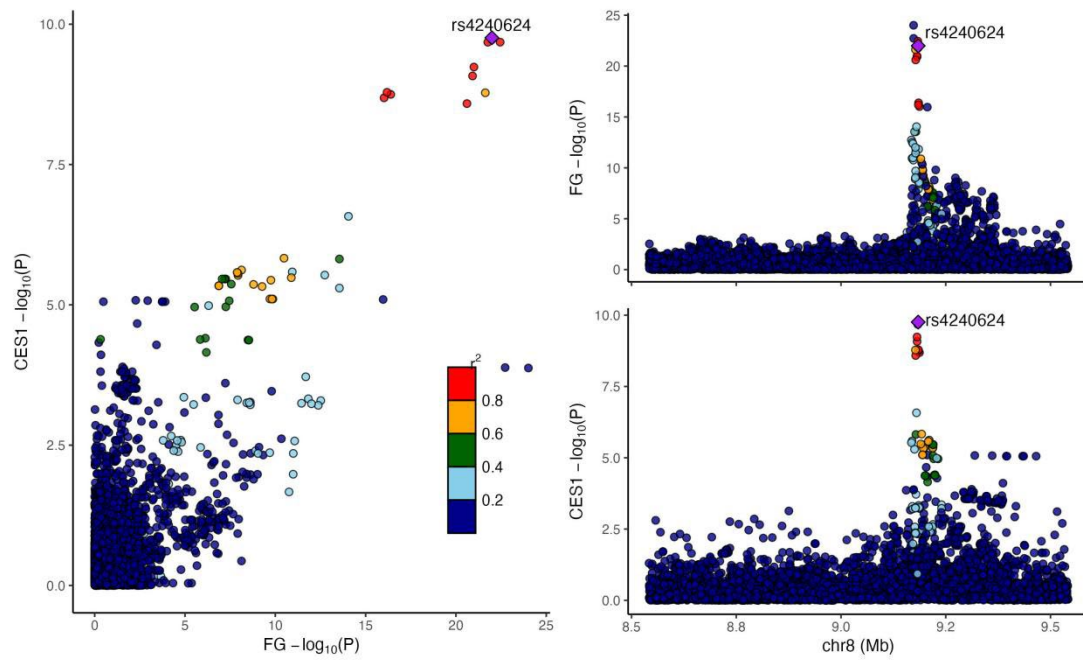

## FG\_CKAP2

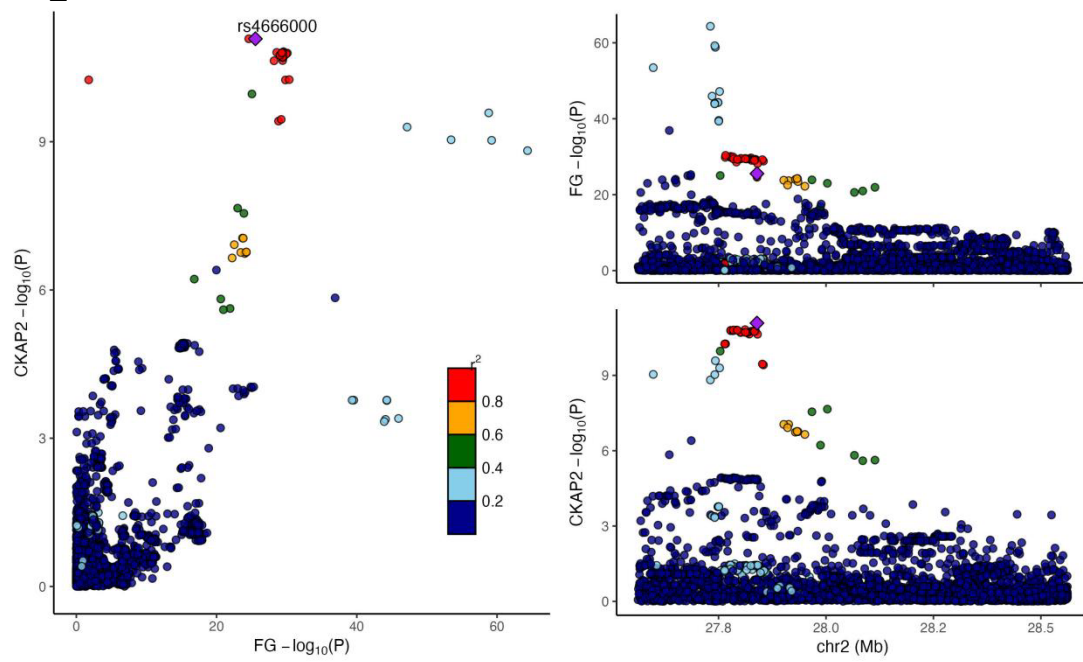



## FG\_CYB5R1

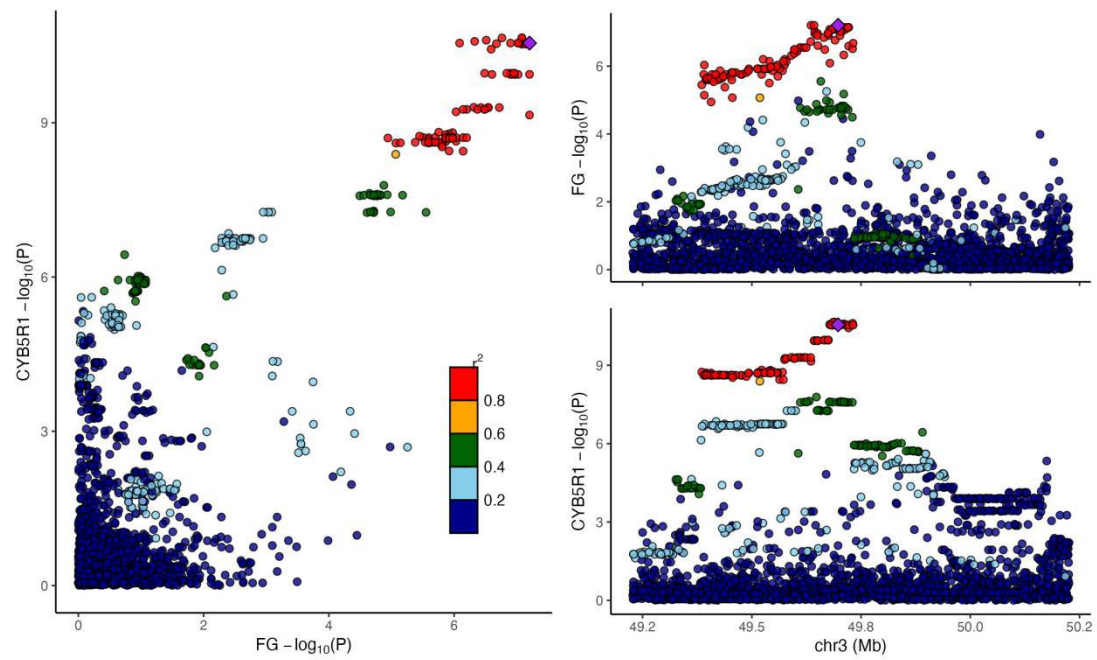

## FG\_IRF9

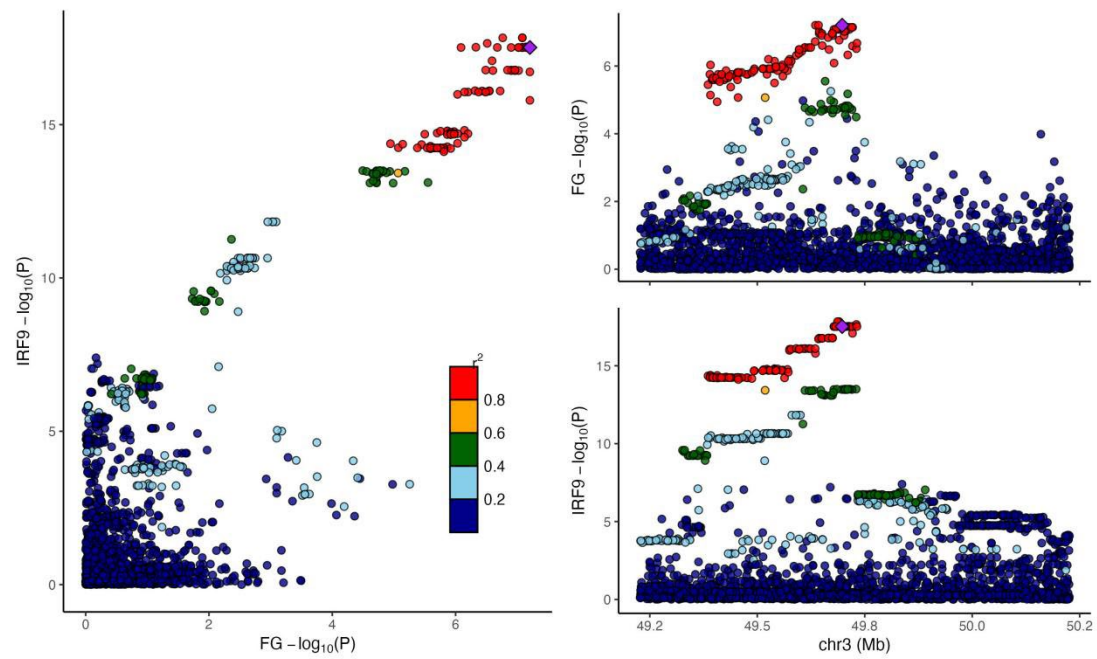



## FG\_MST1

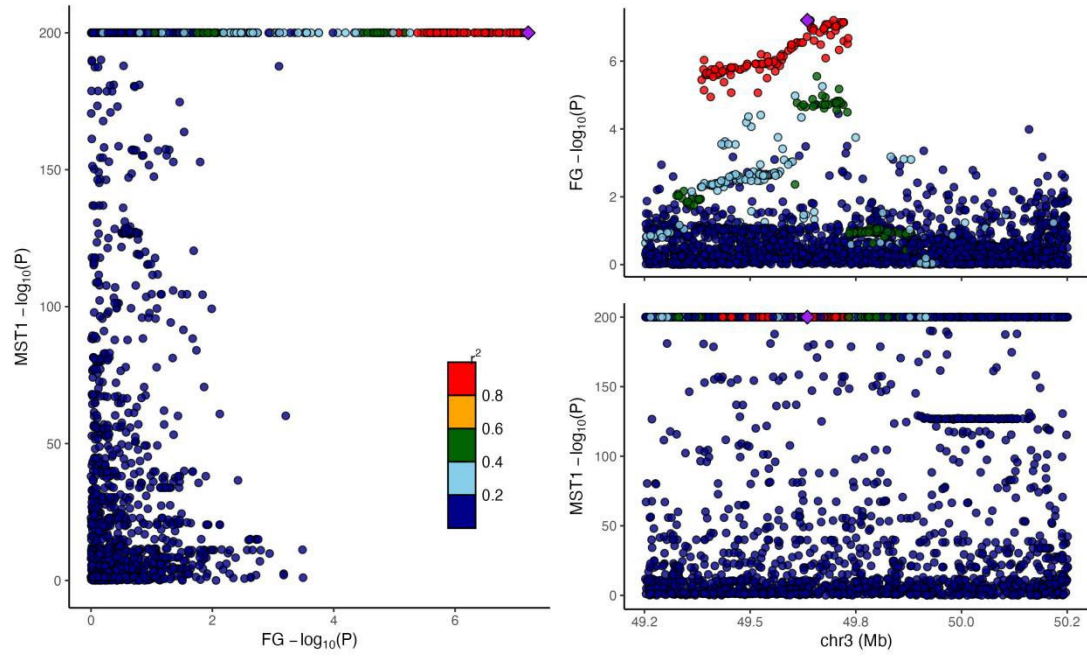

## FG\_NEU1

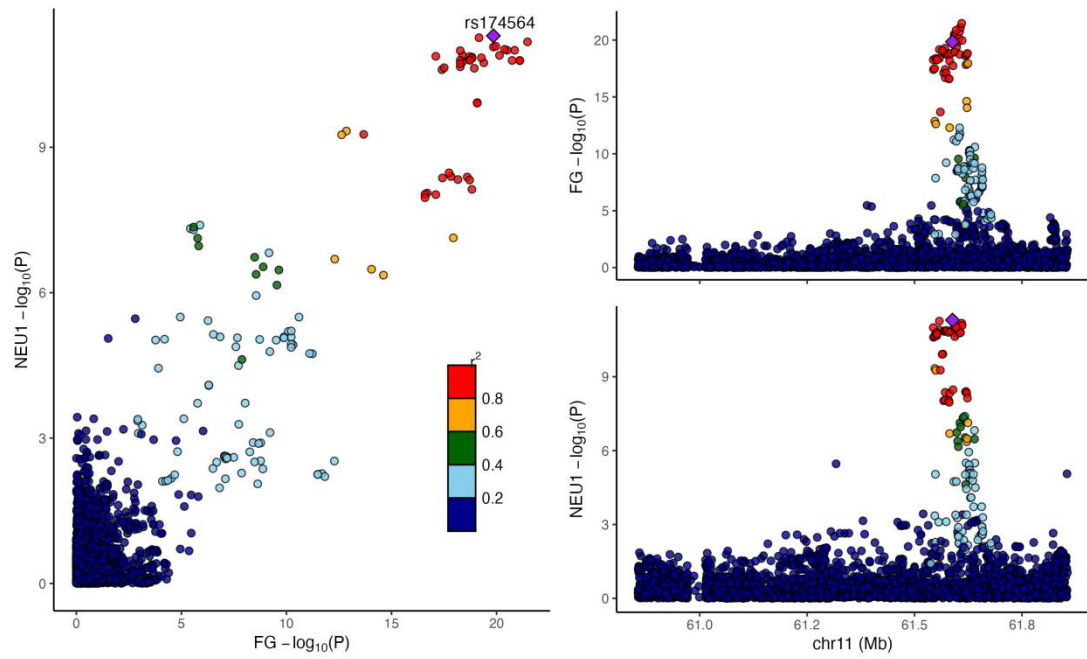



FG\_PHGDH

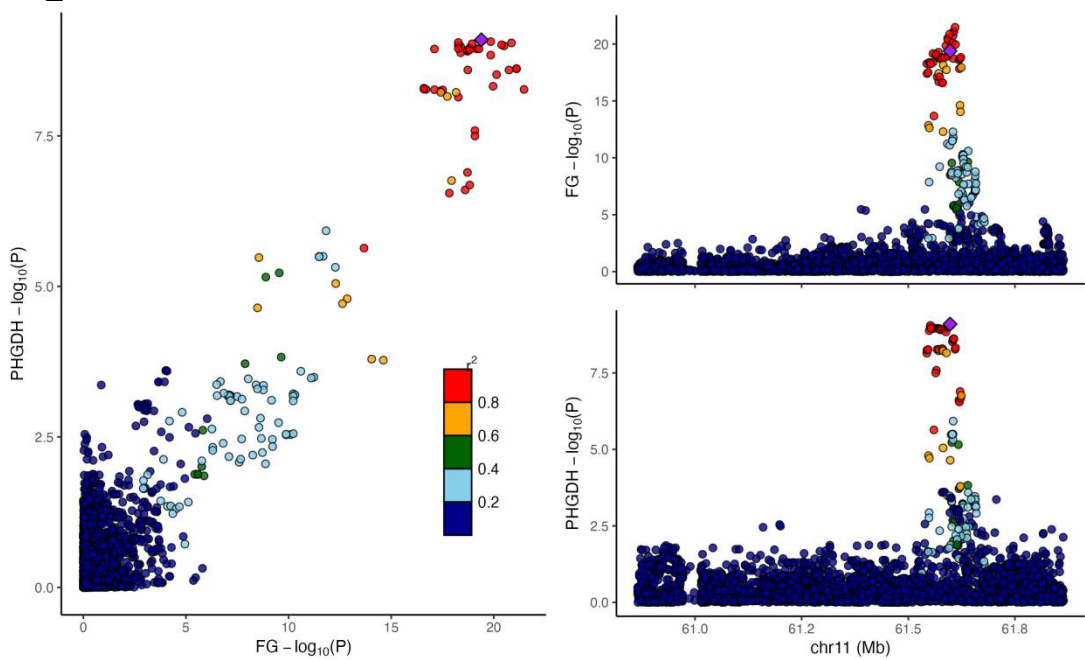

FG\_PITPNA

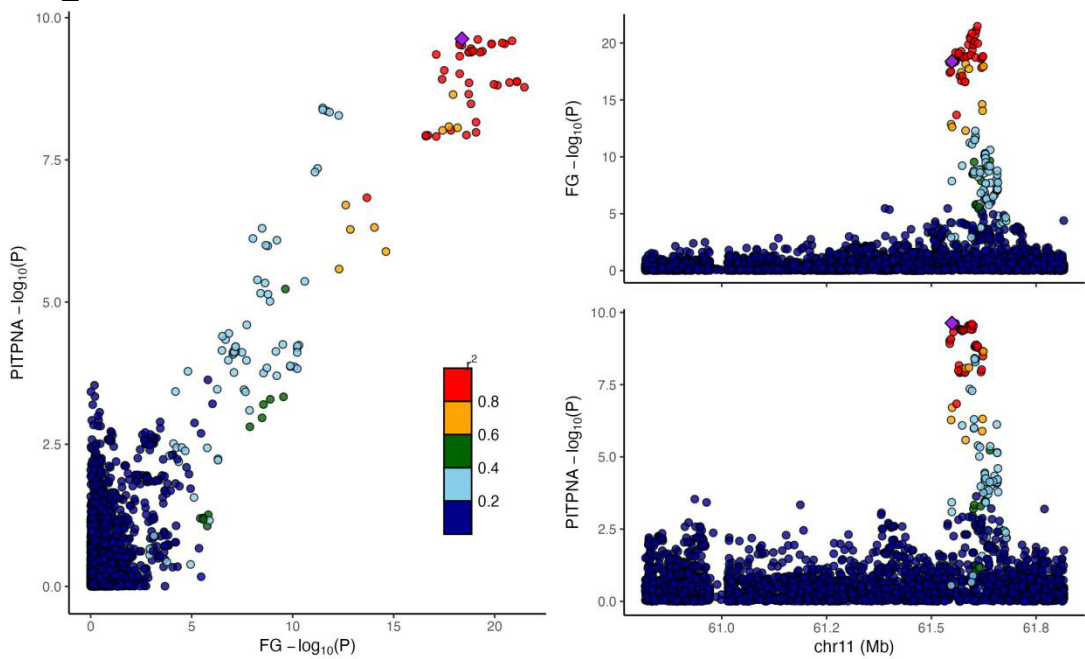



## FG\_STOM

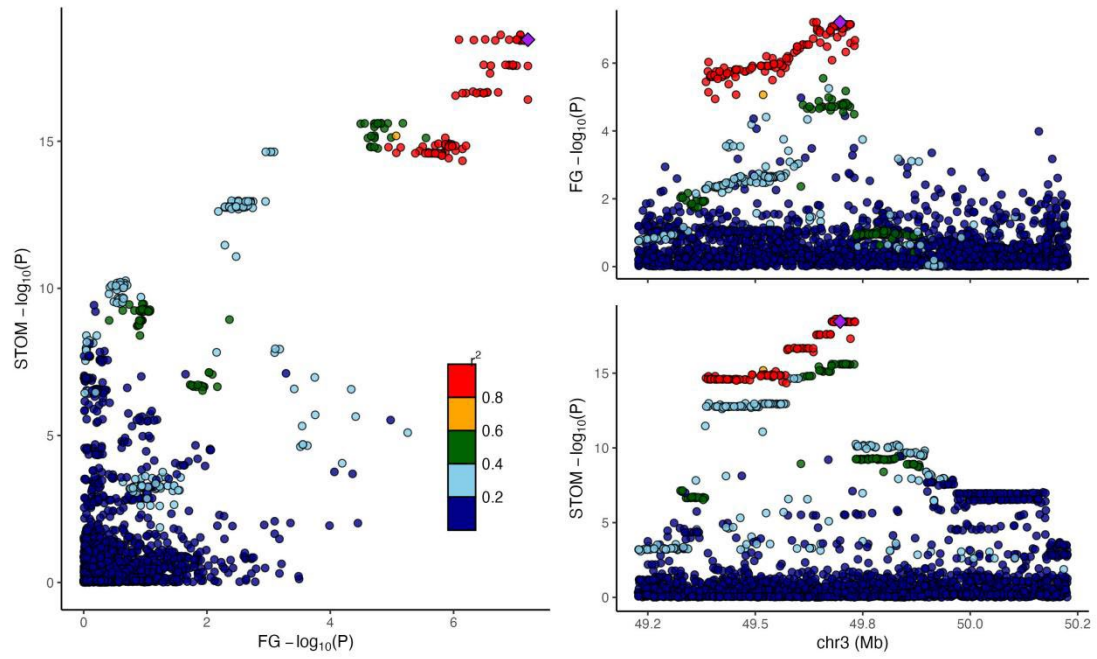

## FG\_TBCA

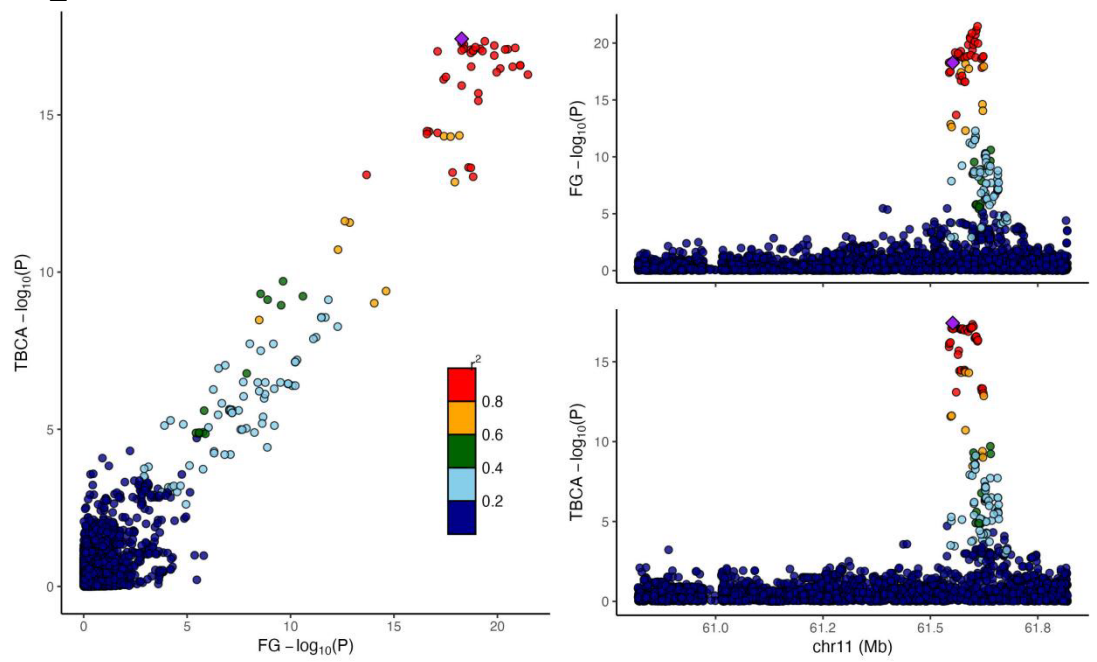



## FG\_TMPRSS11D

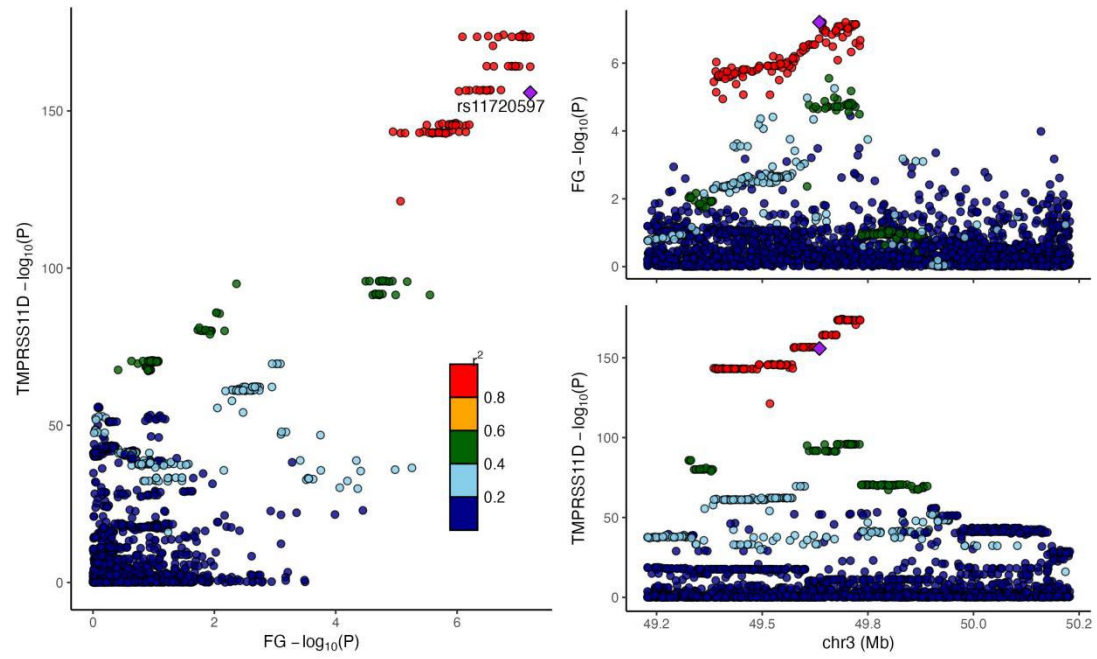

## FI\_CKAP2

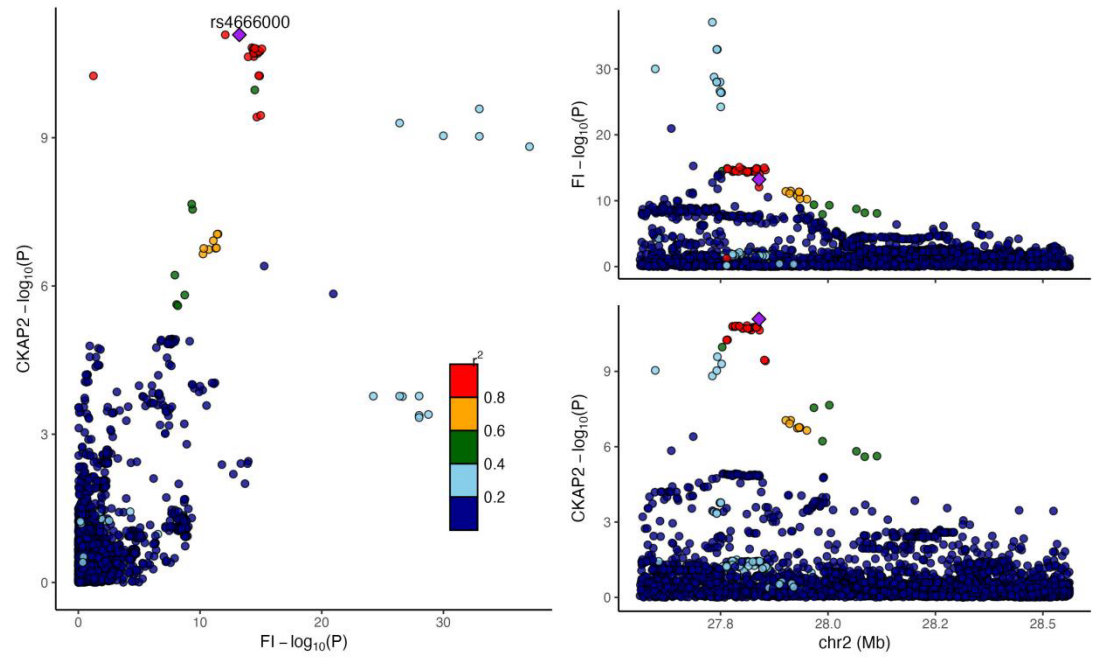



## HbA1c\_ARFIP1

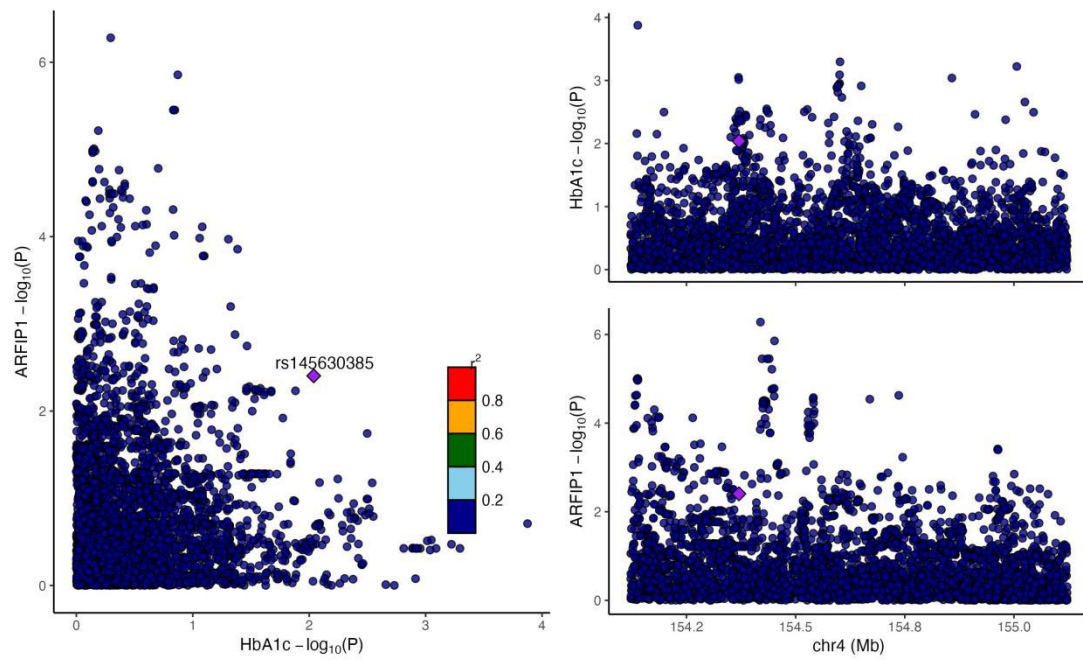

## HbA1c\_ARHGAP1

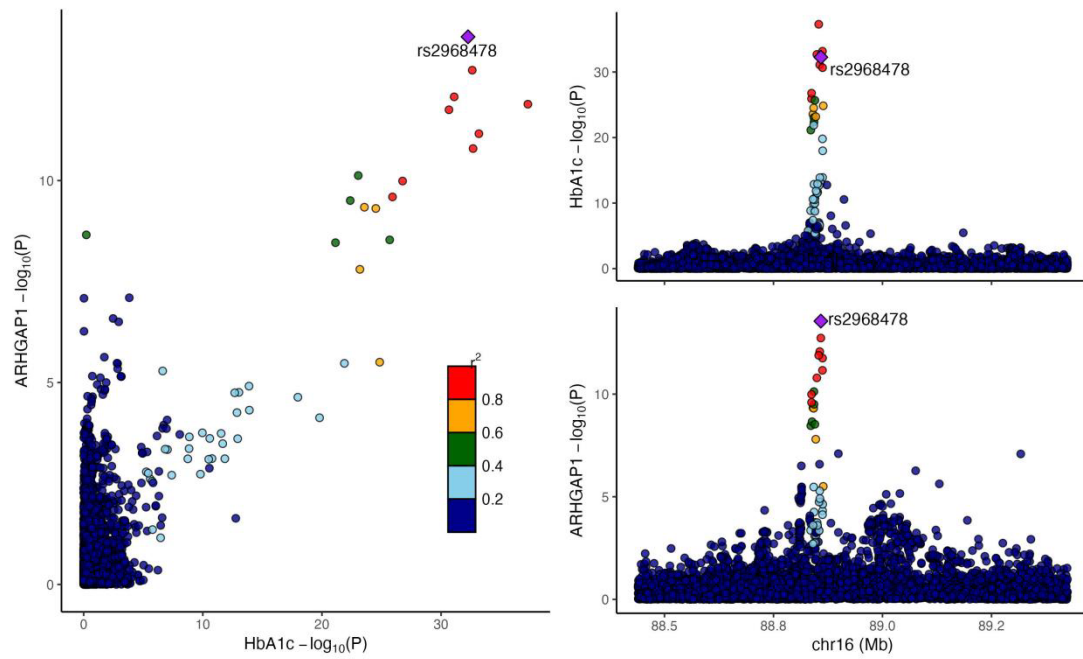



## HbA1c\_ARL2

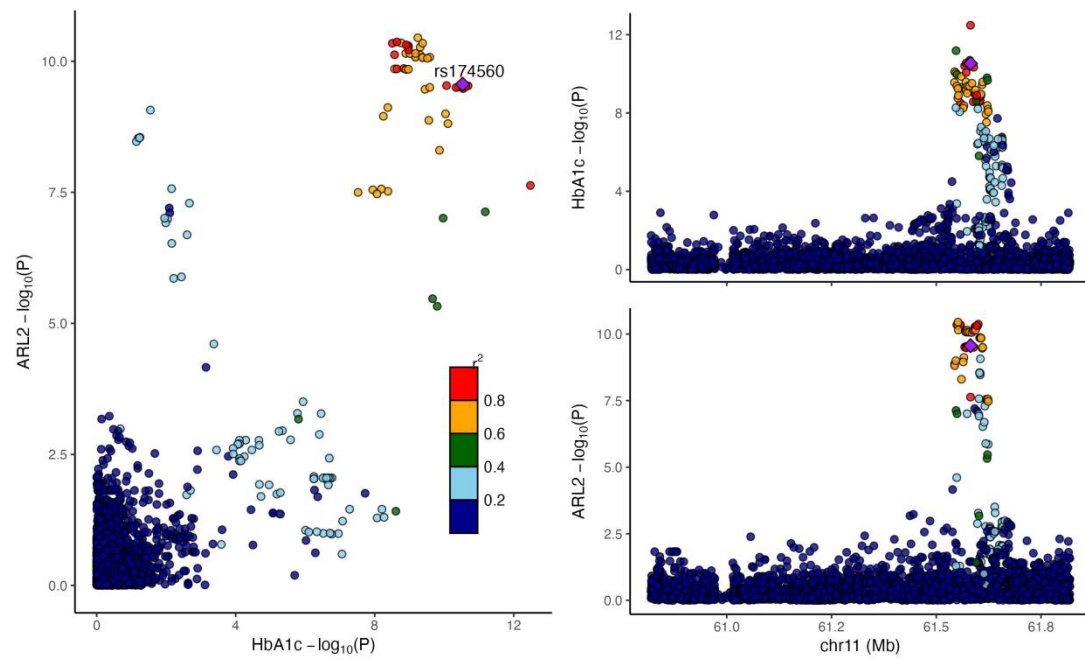

## HbA1c\_BLVRB

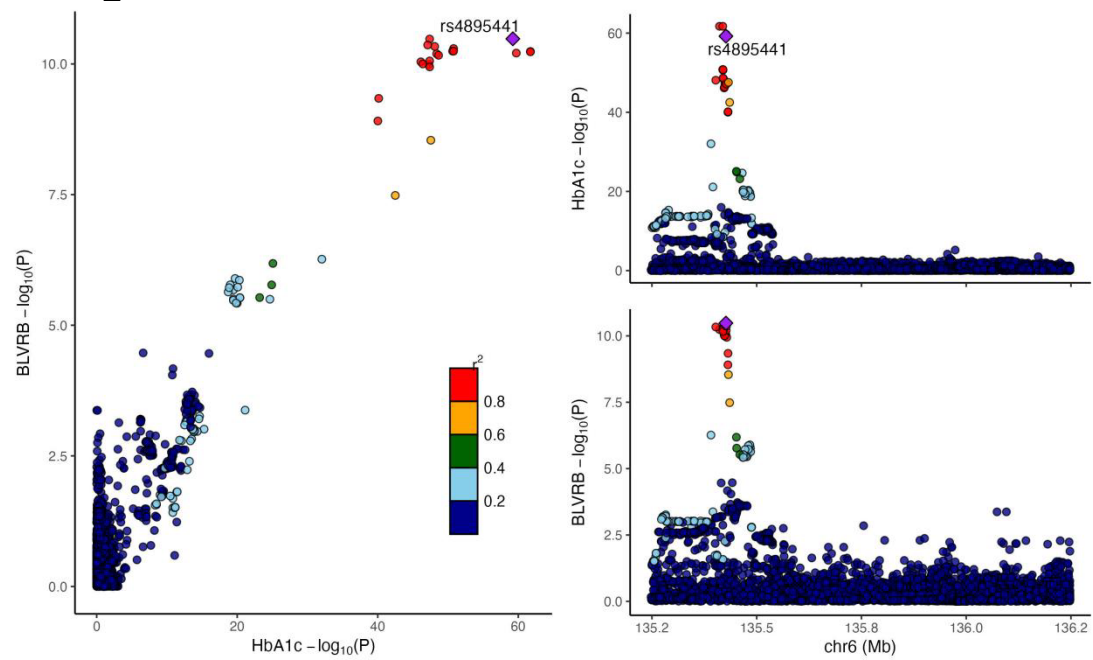



## HbA1c\_CD33

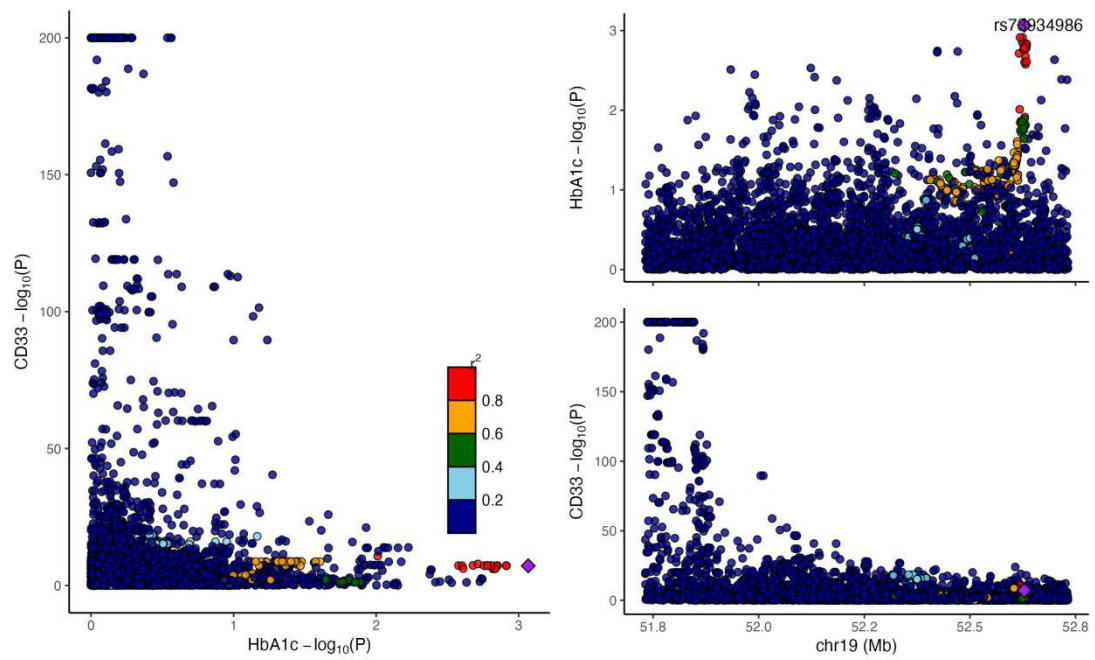

## HbA1c\_NEU1

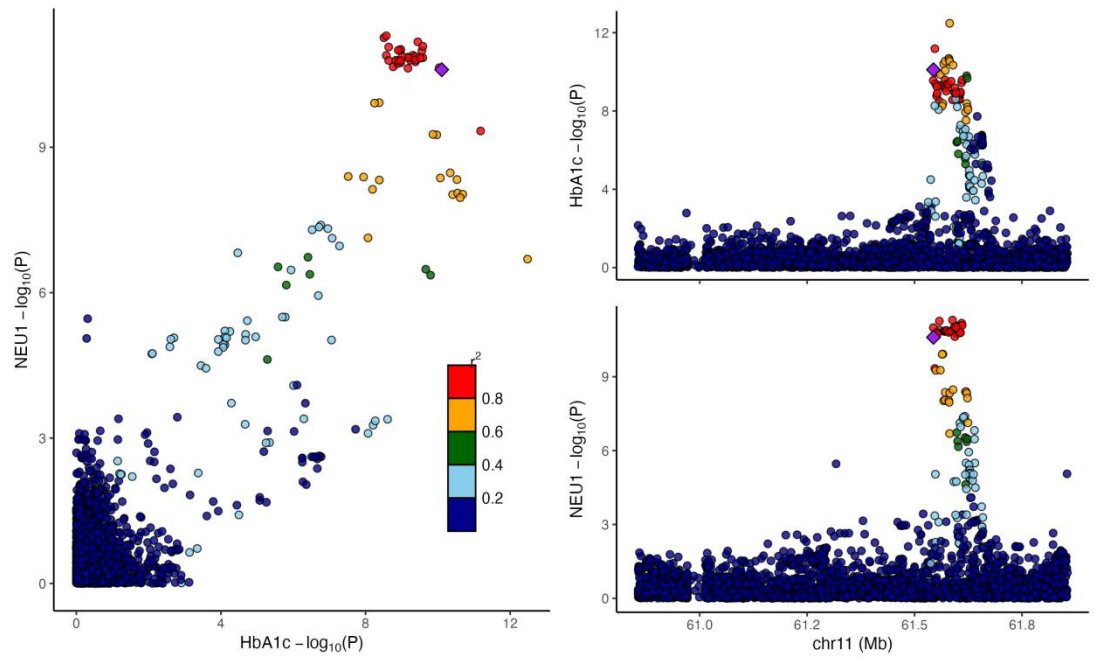



## HbA1c\_NLGN2

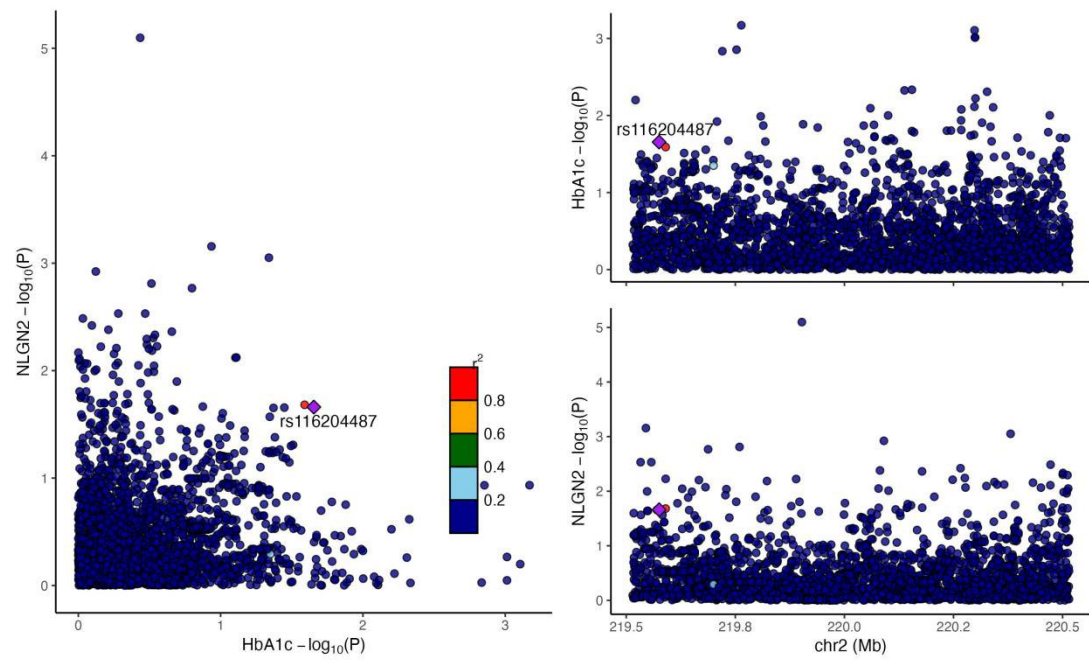

## HbA1c\_PAFAH1B3

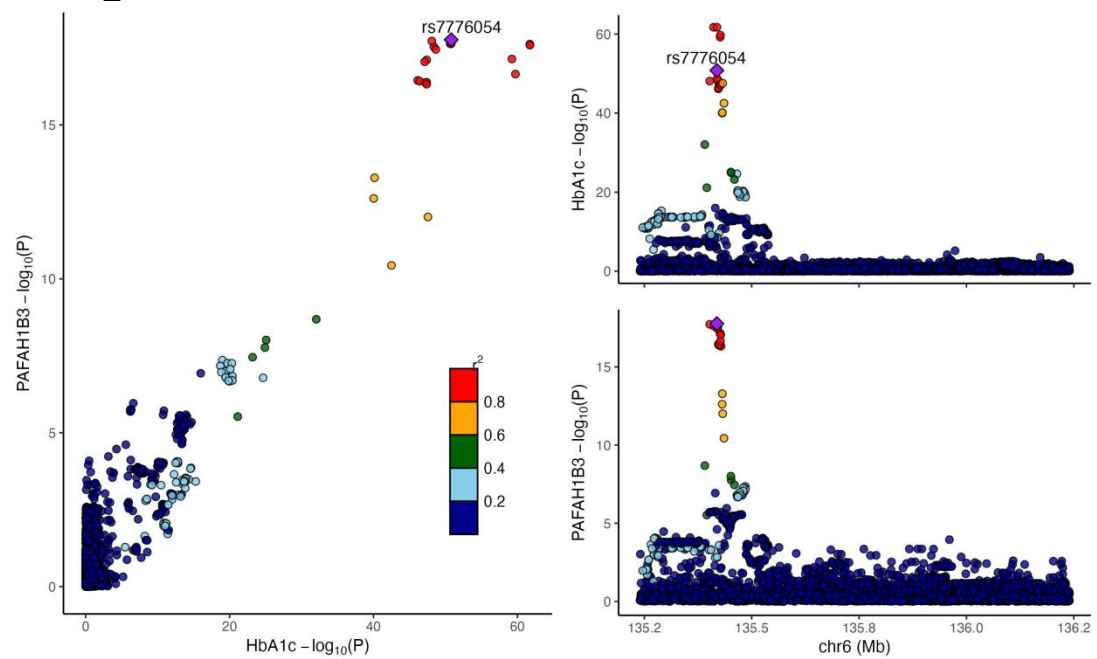



## HbA1c\_PFKM

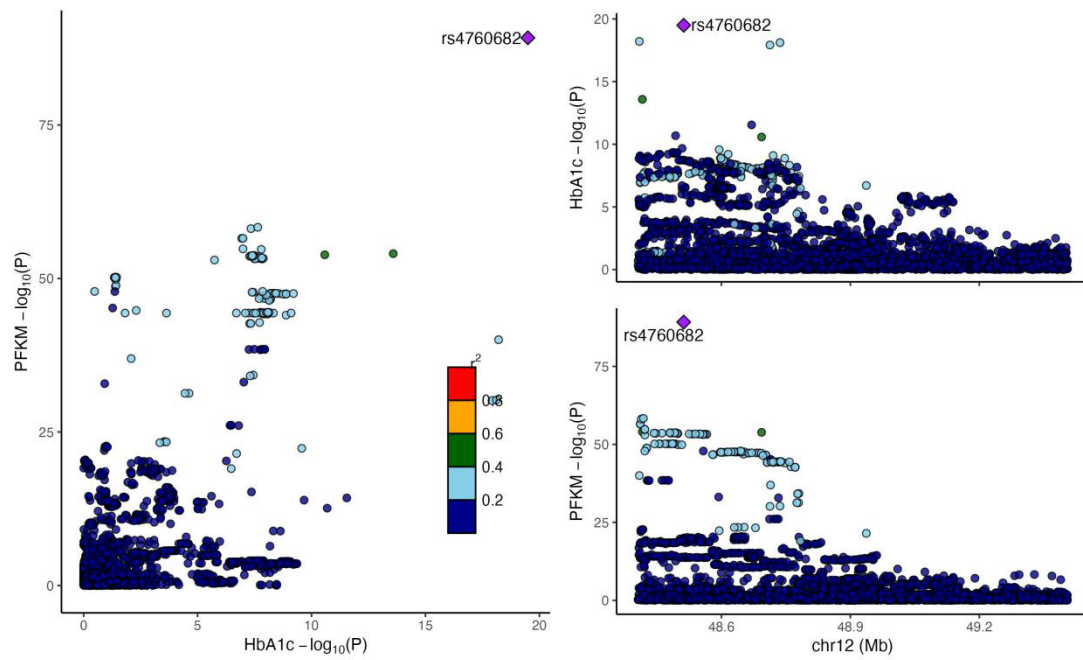

## HbA1c\_PHGDH

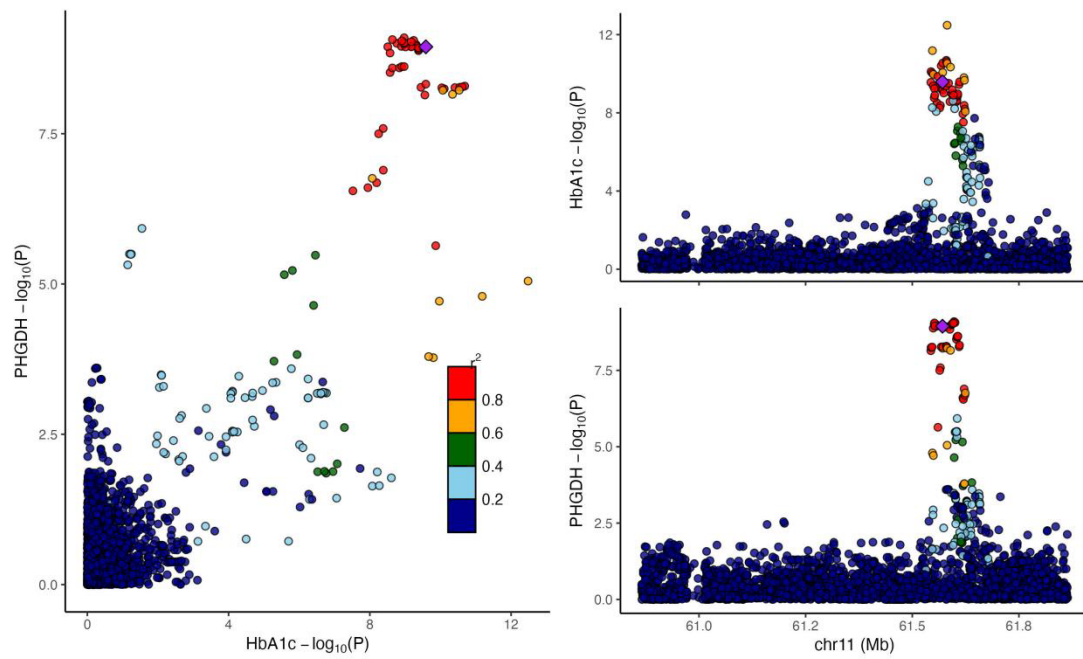



## HbA1c\_PITPNA

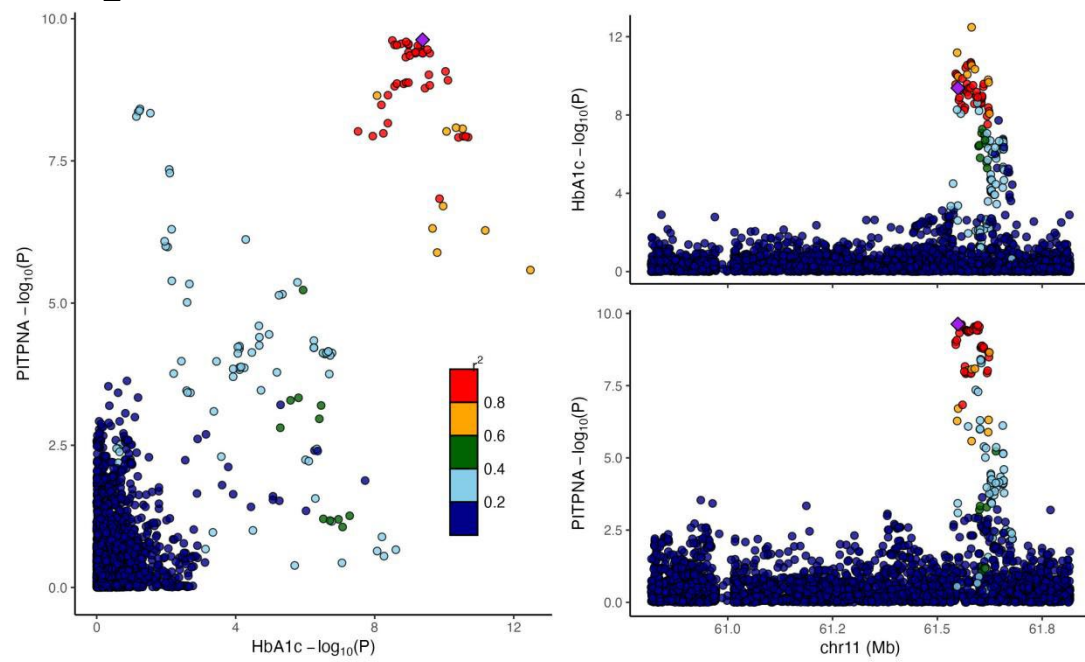

## HbA1c\_STAT1

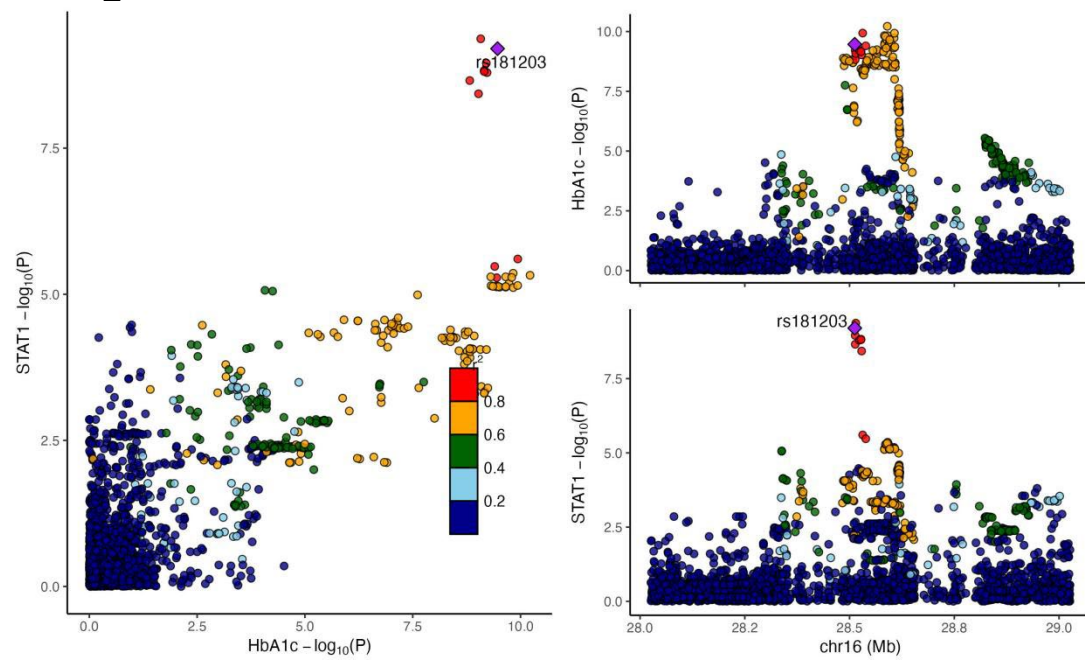



## HbA1c\_STXBP6

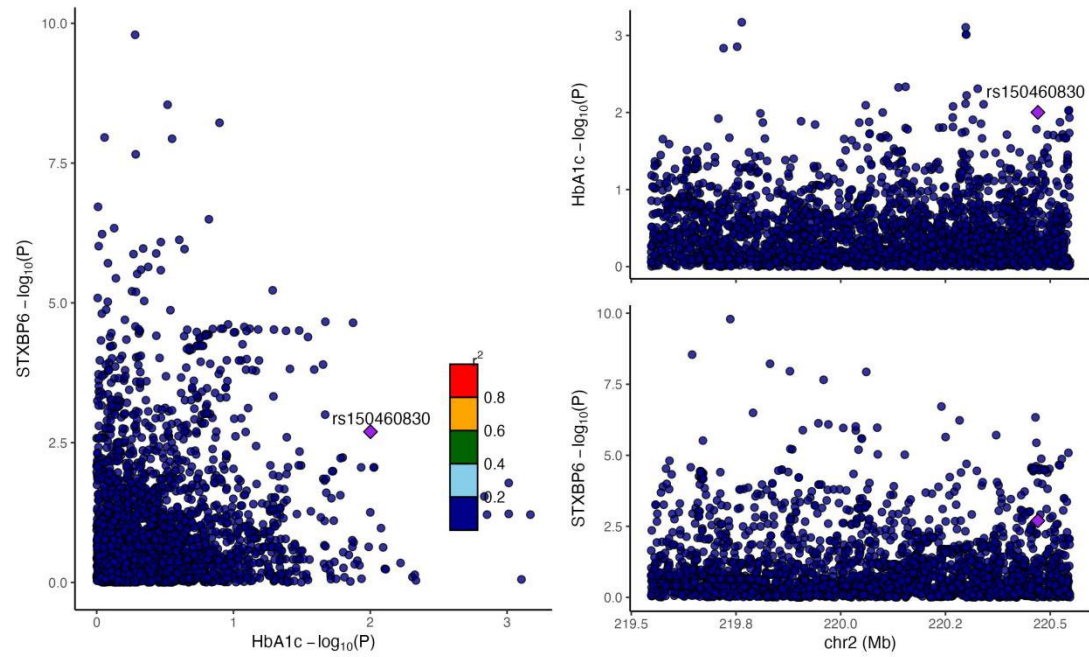

## HbA1c\_TBCA

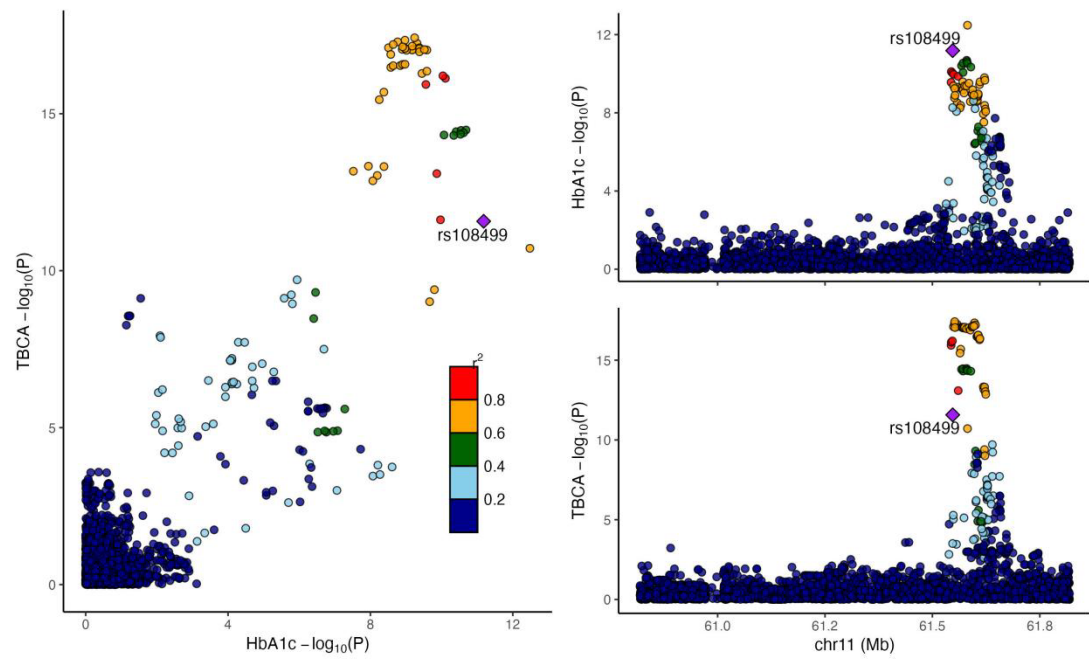



Source: Lasse Folkersen, et al

2hGlu\_F3

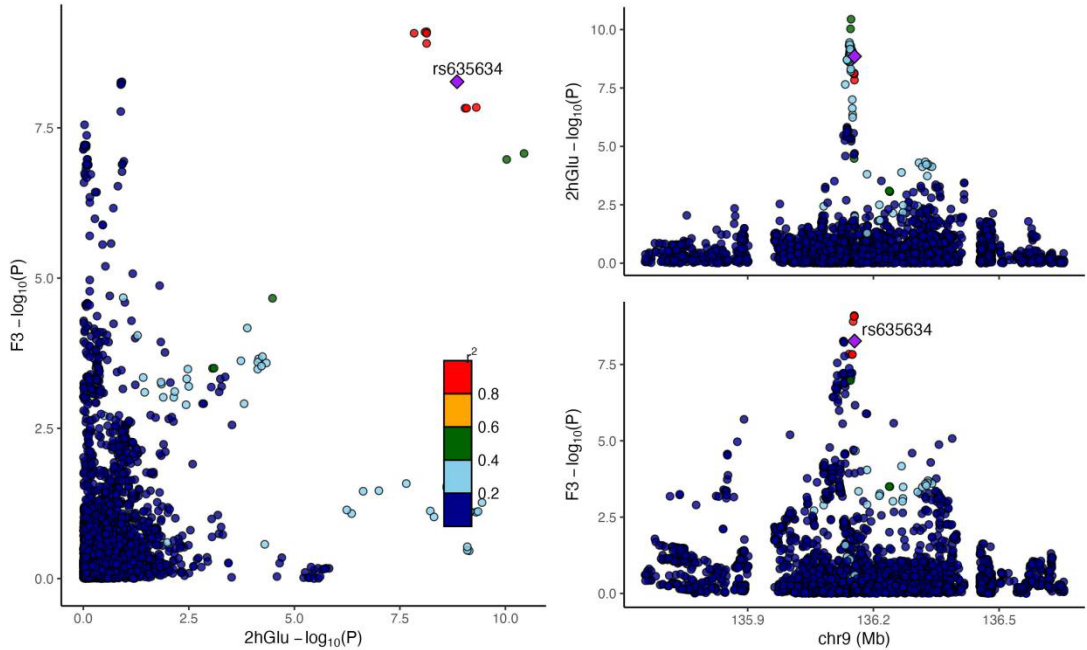

FG\_F3

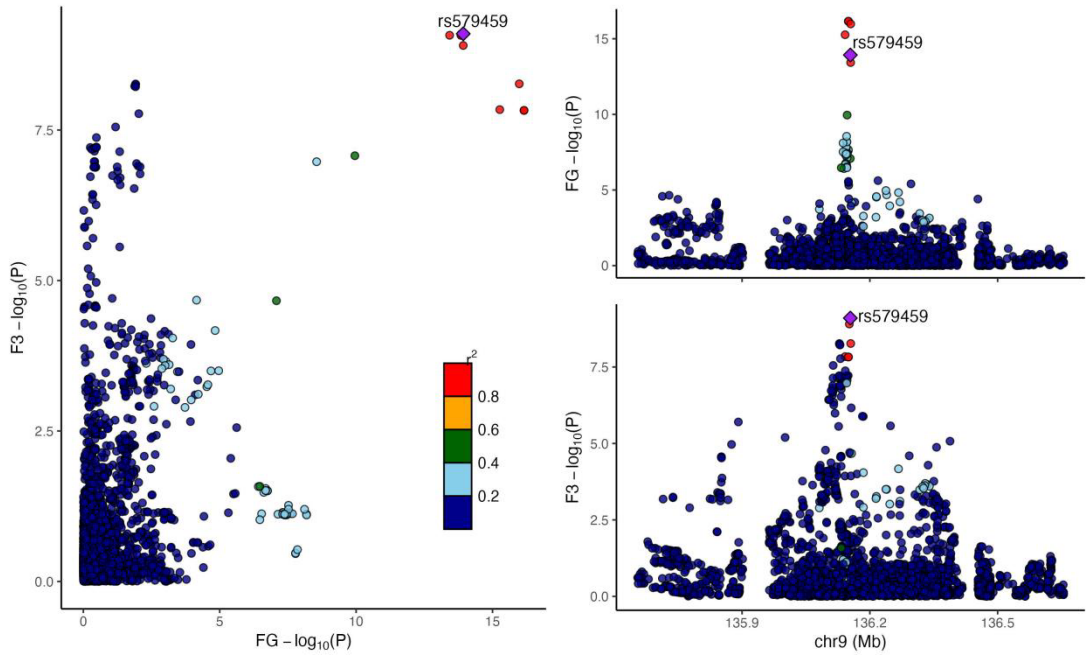



## HbA1c\_F3

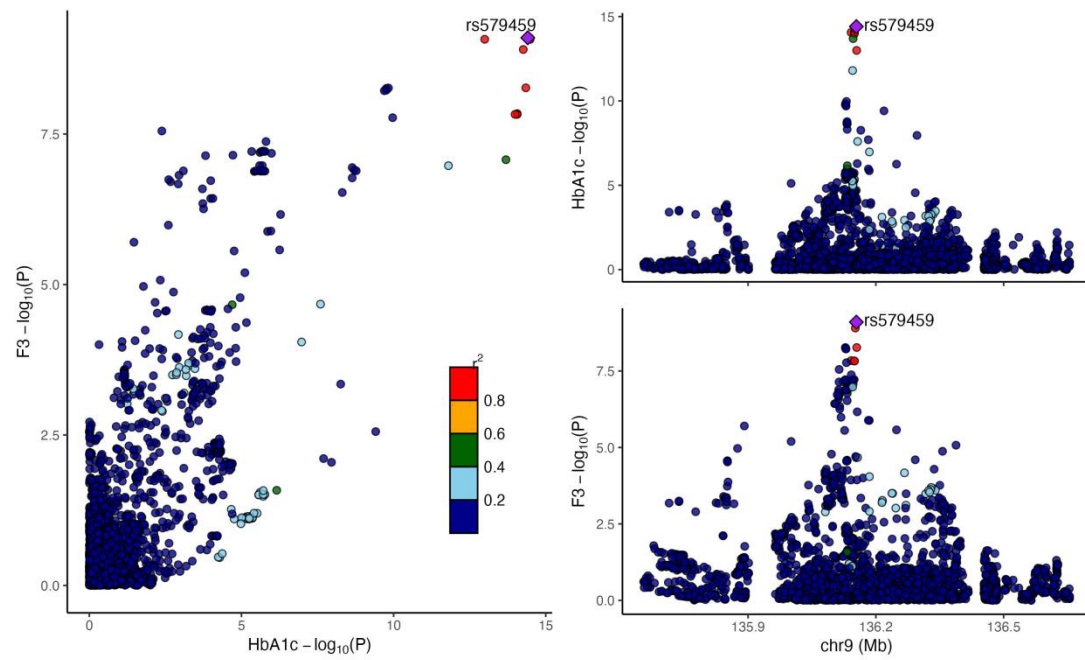

Source: Benjamin B. Sun, et al 2023  
2hGlu\_GOT1

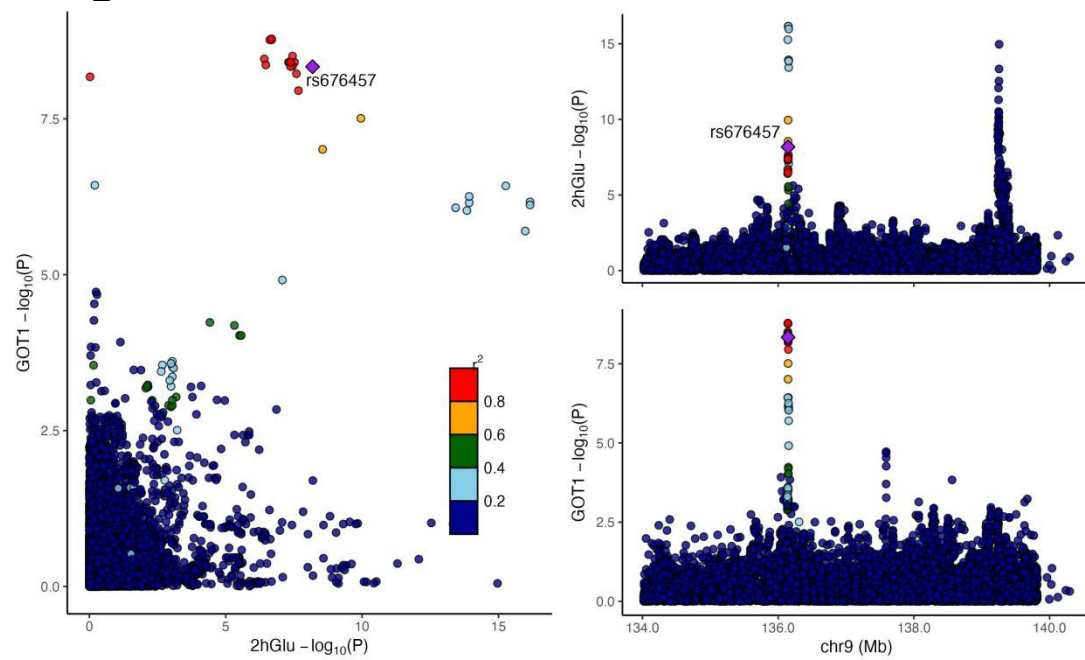



## FG\_CSF2RA

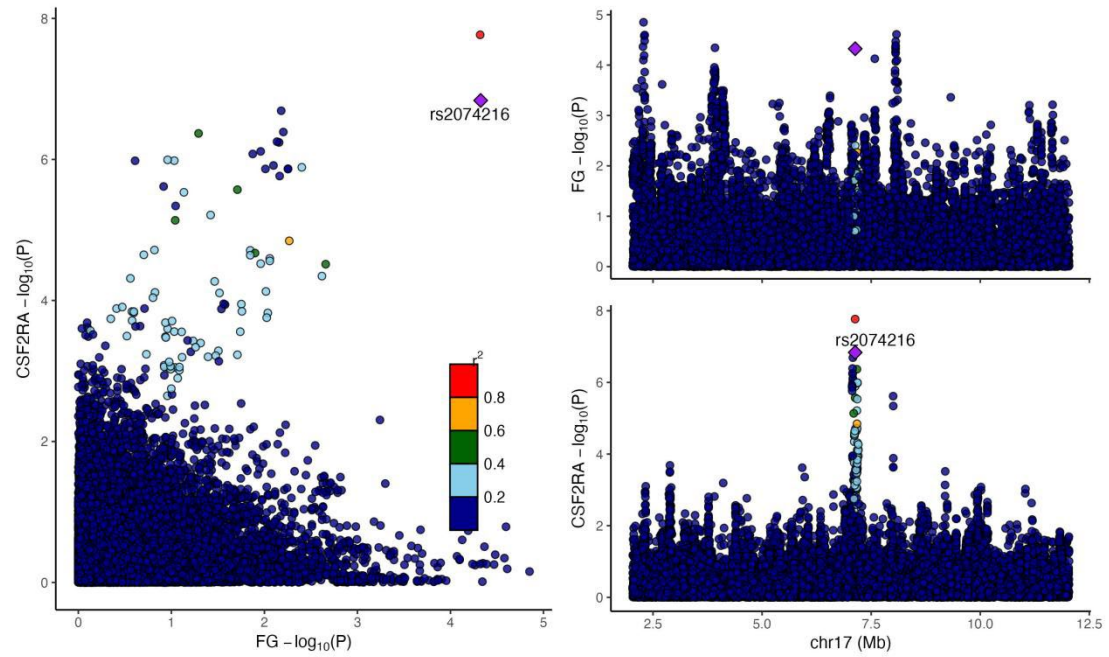

## FG\_DAG1

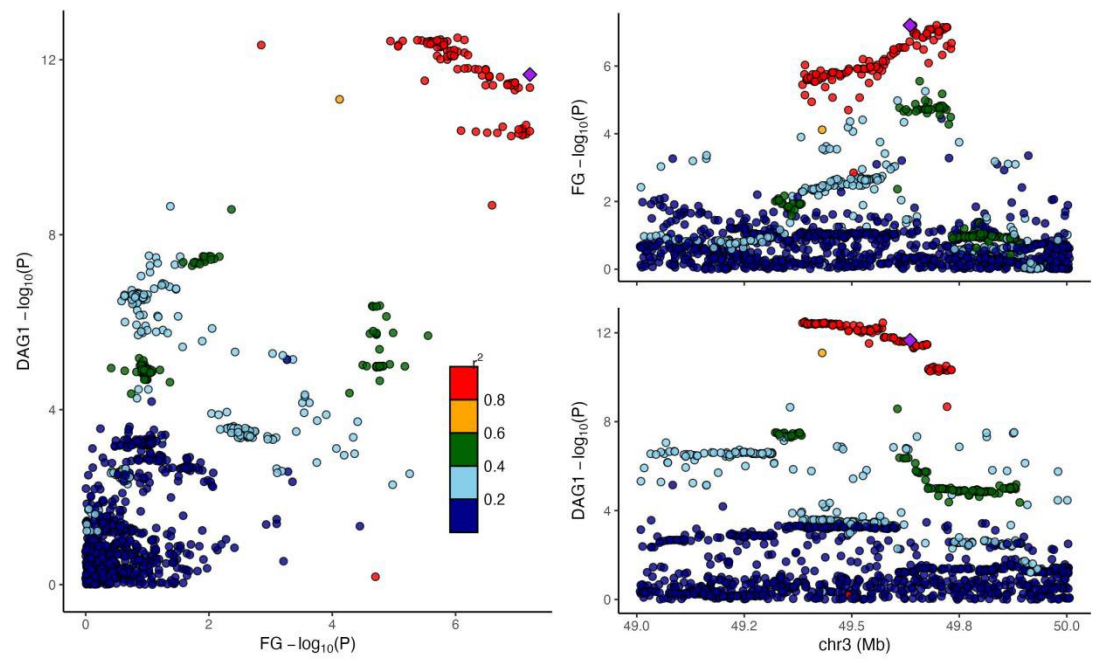



## FG\_GOT1

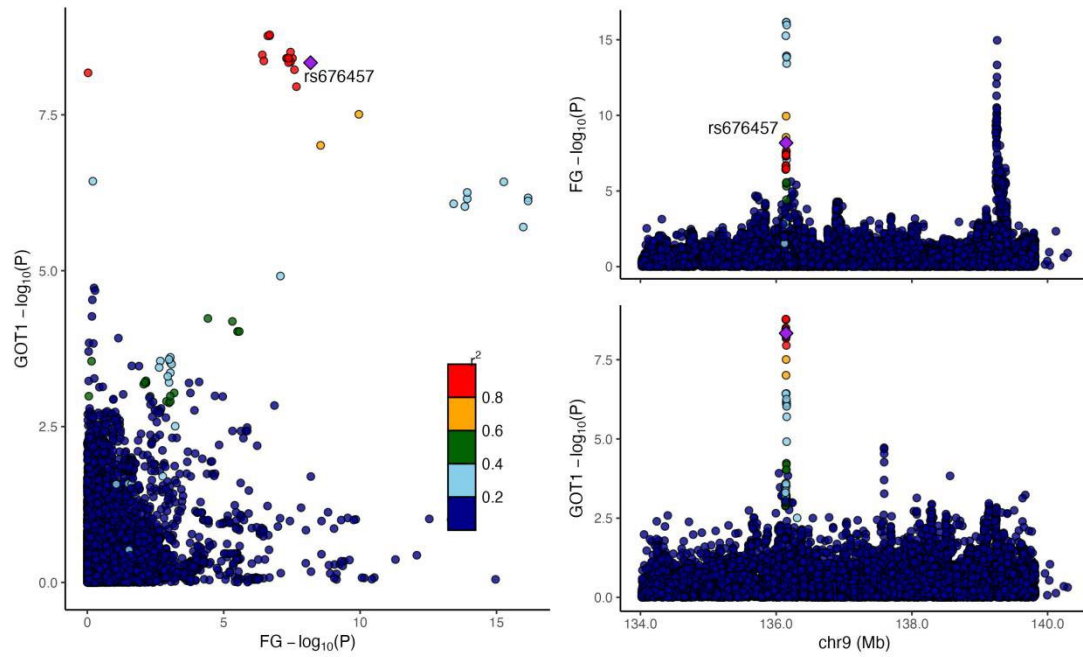

## FG\_UBE2Z

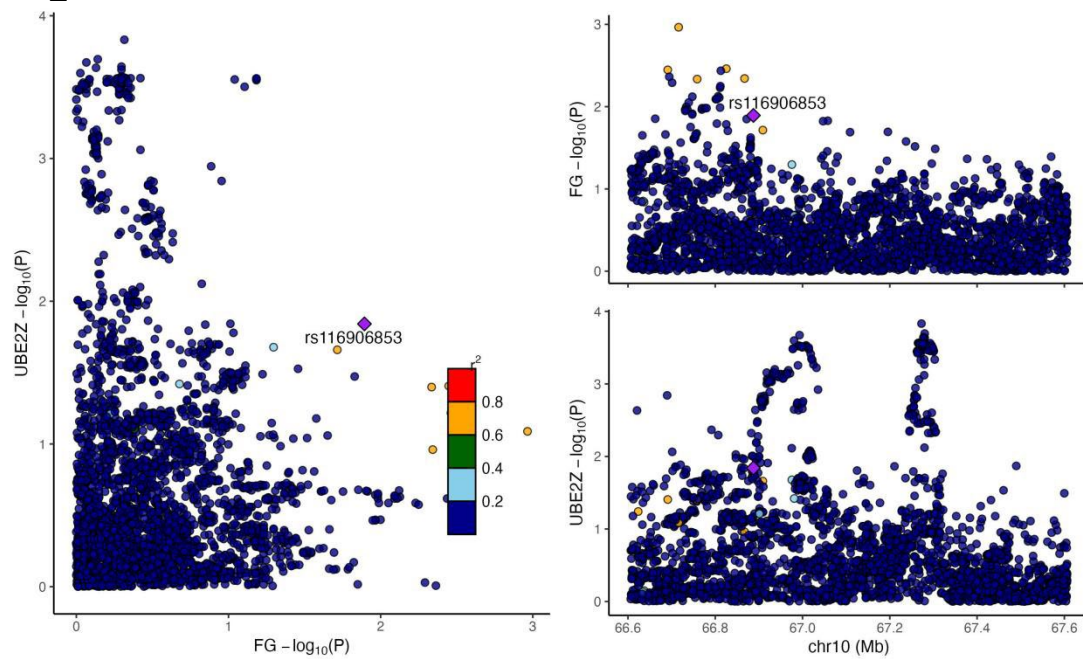



## FI\_INSR

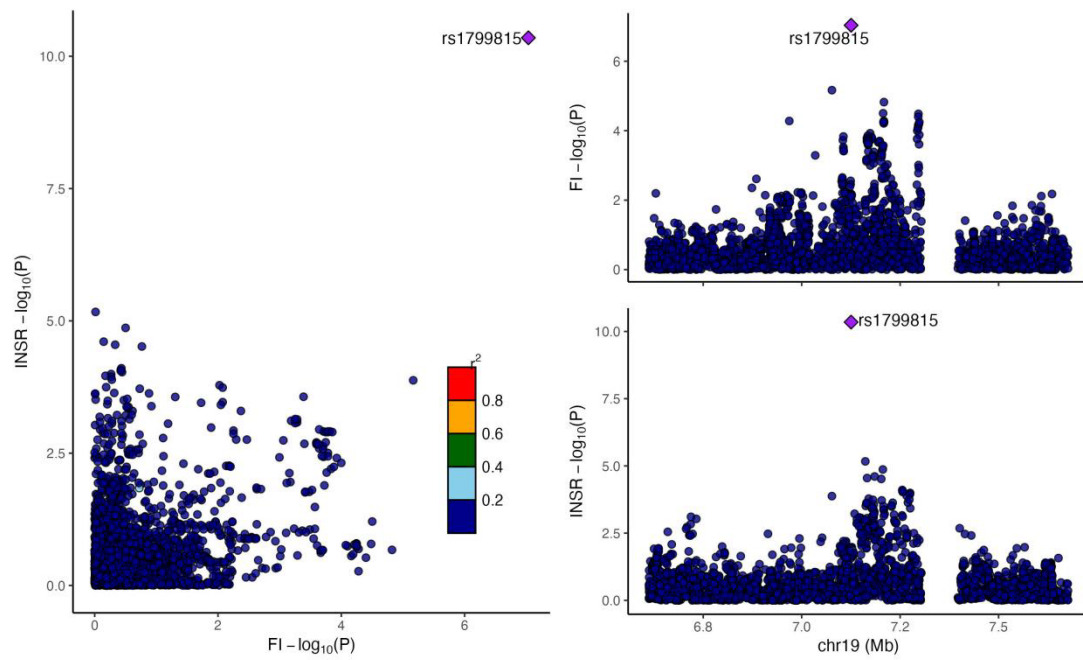

## HbA1c\_ARF6

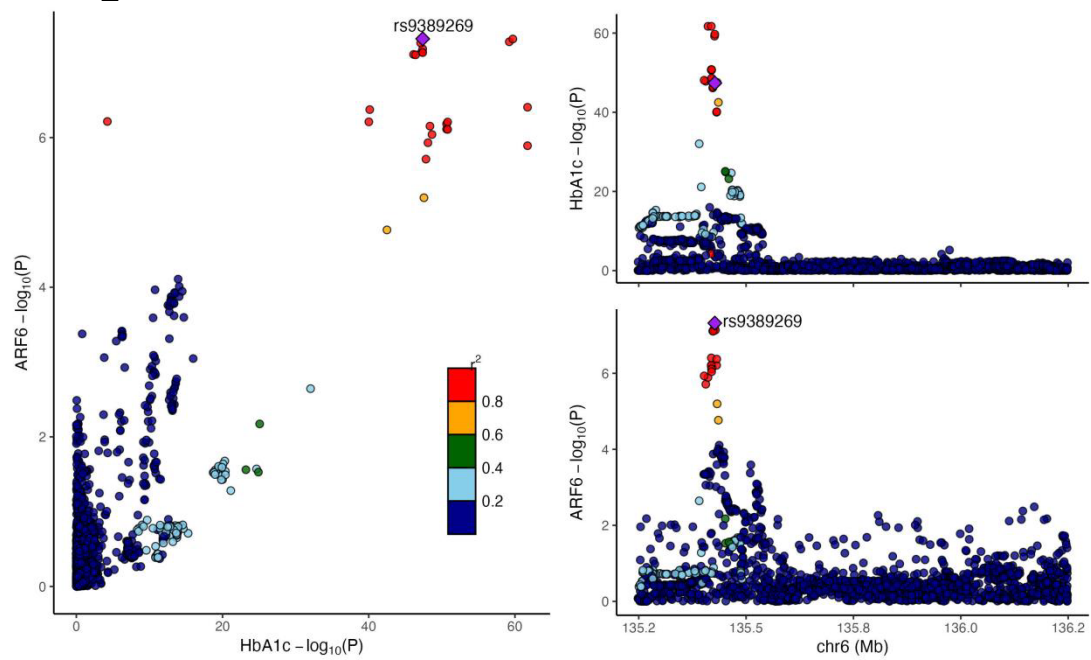



## HbA1c\_ARFIP1

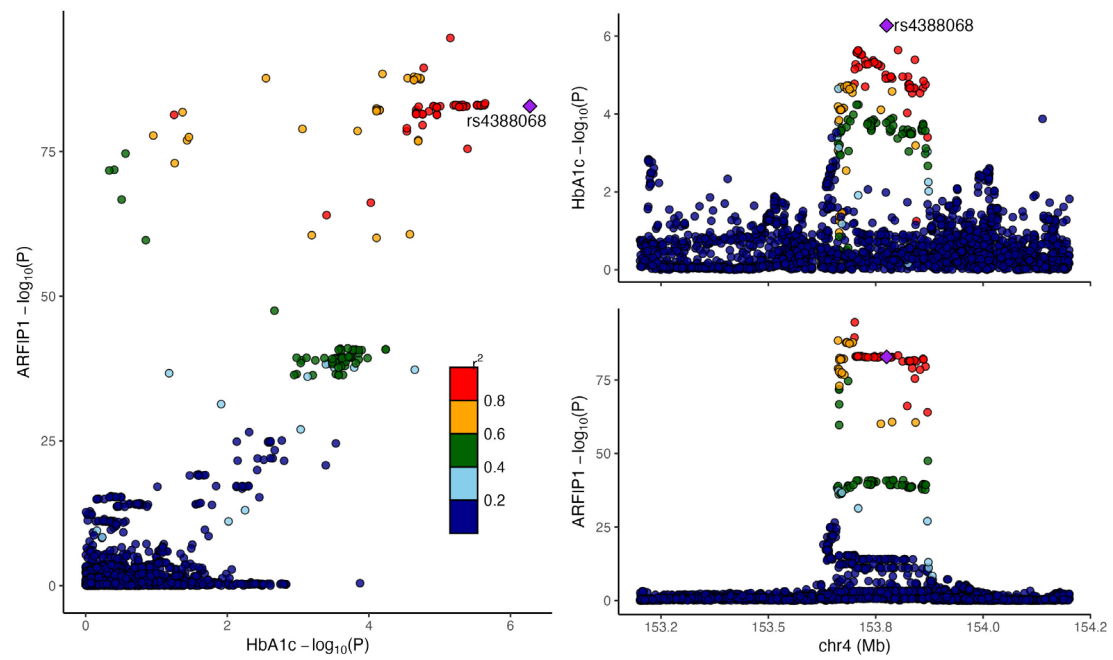

## HbA1c\_IMPACT

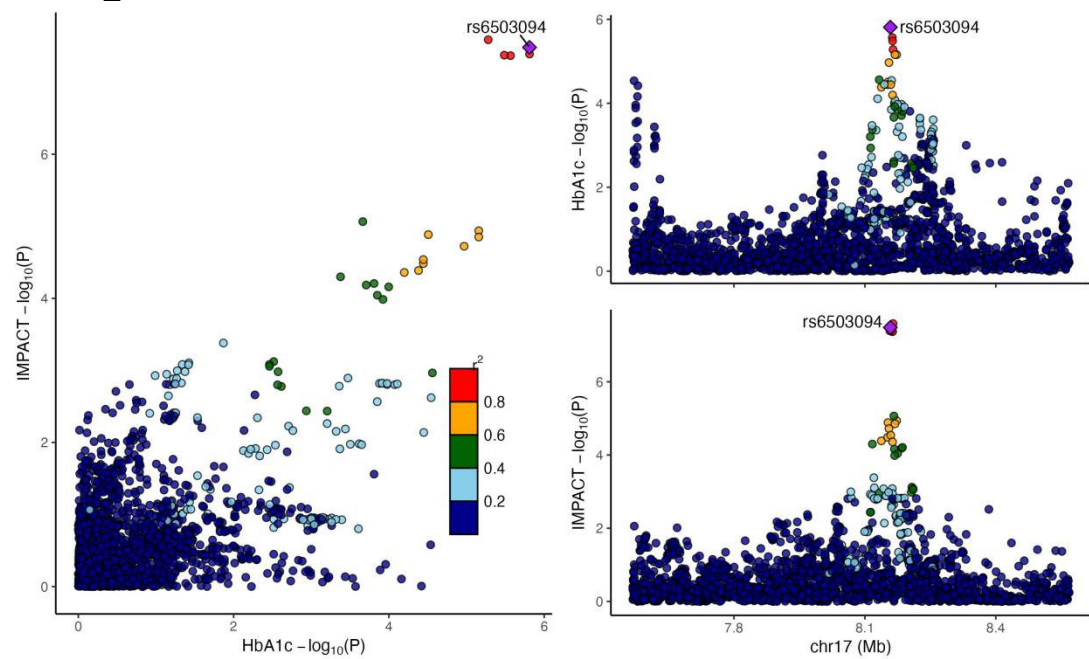



## HbA1c\_METAP2

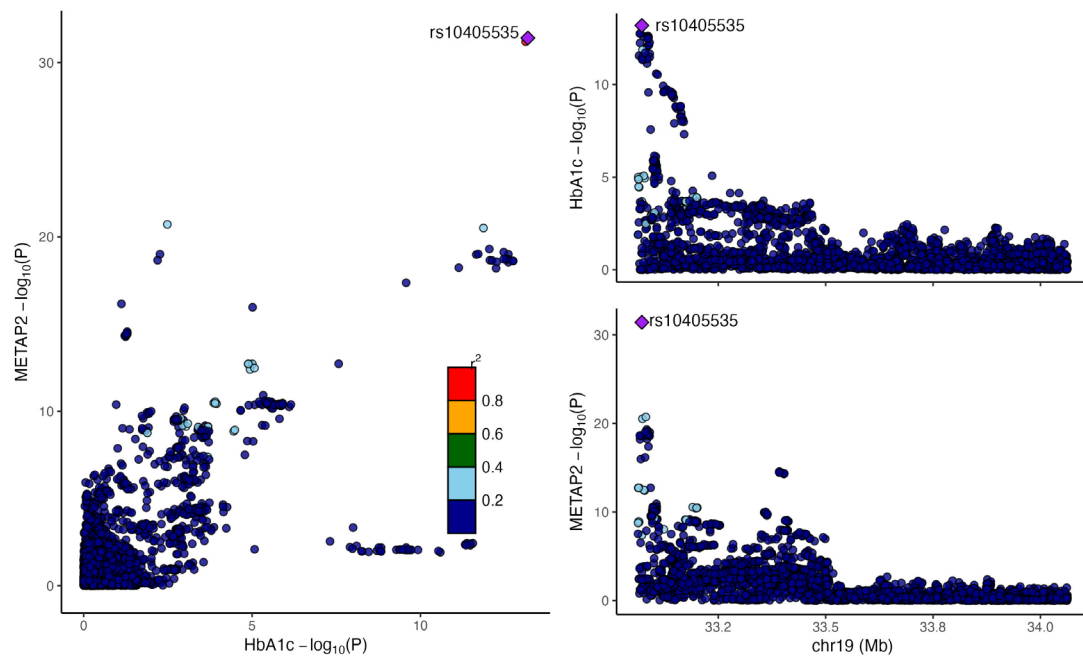

## Source: Arthur Gilly, et al FI\_CDH5

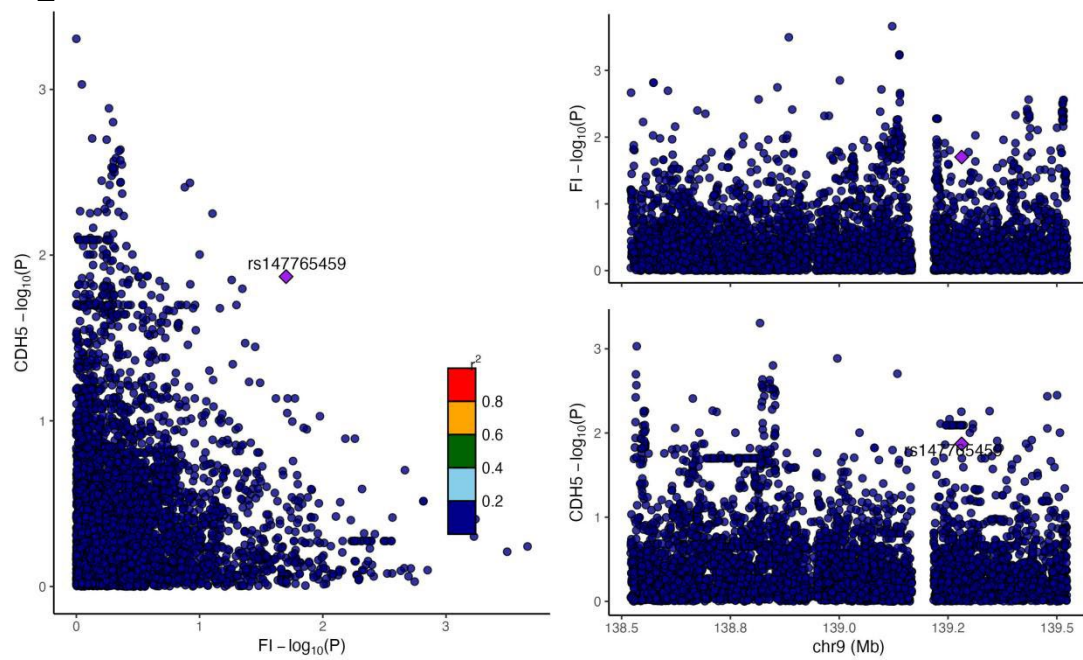

Supplement: Supplementary file 3 [file 1]
