# Supplementary material
Source: publisher figshare collection journal article supplement (https://diabetesjournals.figshare.com/articles/dataset/_/27233946)

## Supplementary Figures

Supplementary Figure 1: Volcano plot for the cis-trans MR analyses, with circles representing the results for proteins on glycemic traits. (A) for fasting glucose (FG); (B) for fasting insulin (FI); (C) for 2-h glucose after an oral glucose challenge (2hGlu); (D) for glycated hemoglobin (HbA1c)

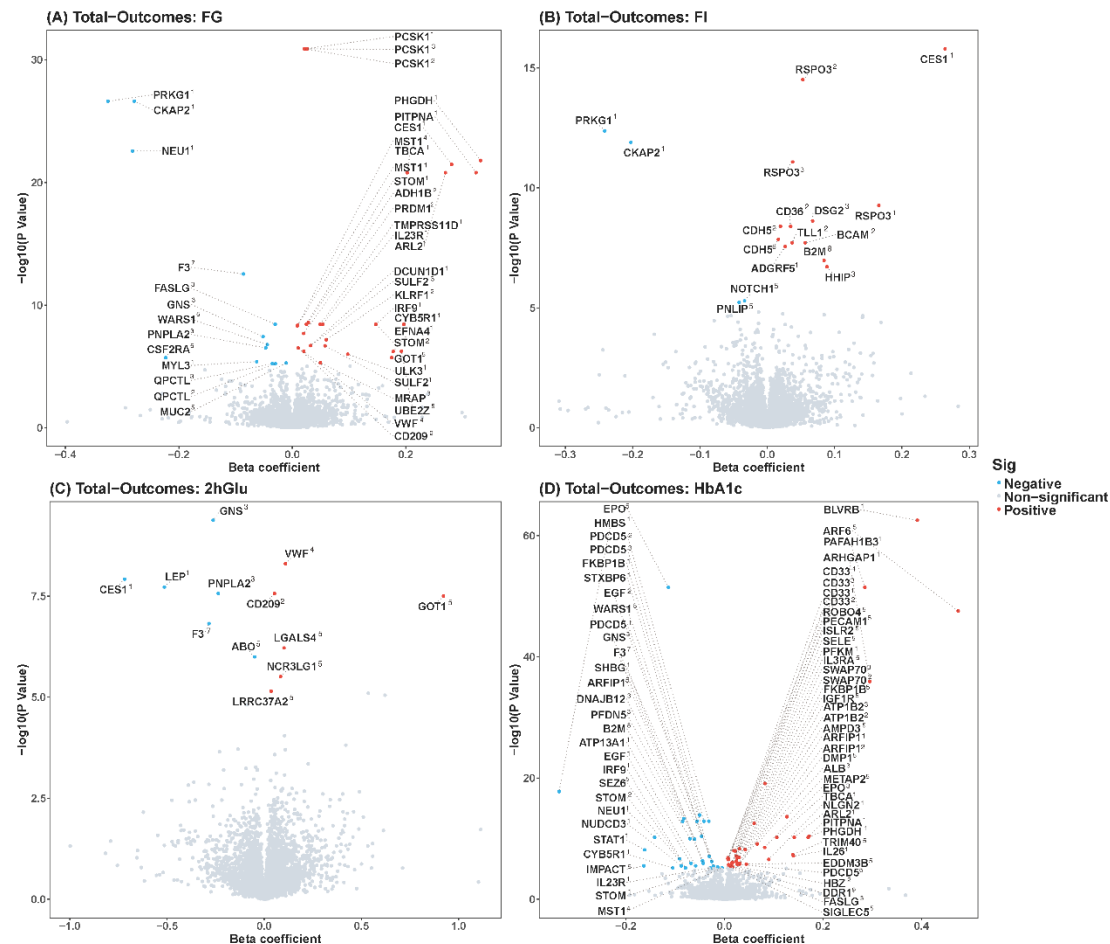

<sup>1</sup>Egil Ferkingstad, et al 2021

<sup>2</sup>Benjamin B. Sun, et al 2018

<sup>3</sup>Alexander Gudjonsson, et al 2022

<sup>4</sup>Karsten Suhre, et al 2017

<sup>5</sup>Benjamin B. Sun, et al 2023

<sup>6</sup>Arthur Gilly, et al 2020

<sup>7</sup>Lasse Folkersen, et al 2017

<sup>8</sup>Chen Yao, et al 2018

<sup>9</sup>Robert F. Hillary, et al 2019

Supplementary Figure 2. Protein – protein interaction networks of the cis-pQTLs

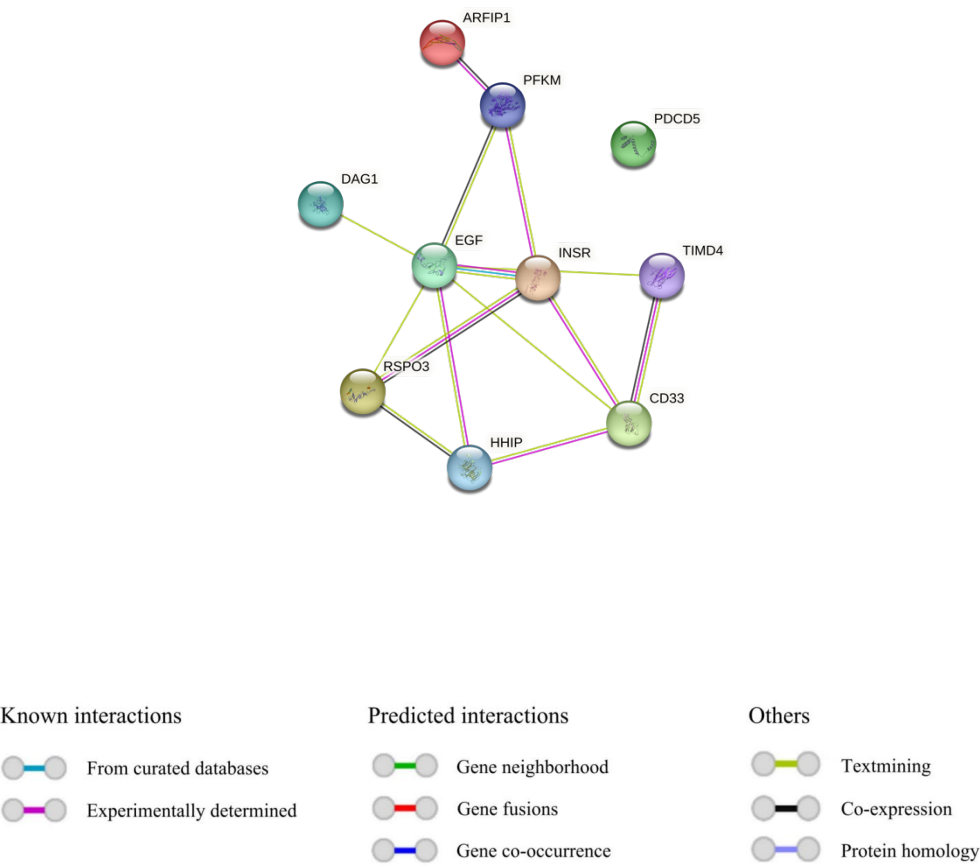

Supplementary Figure 3. Protein – protein interaction networks of the cis/trans-pQTLs

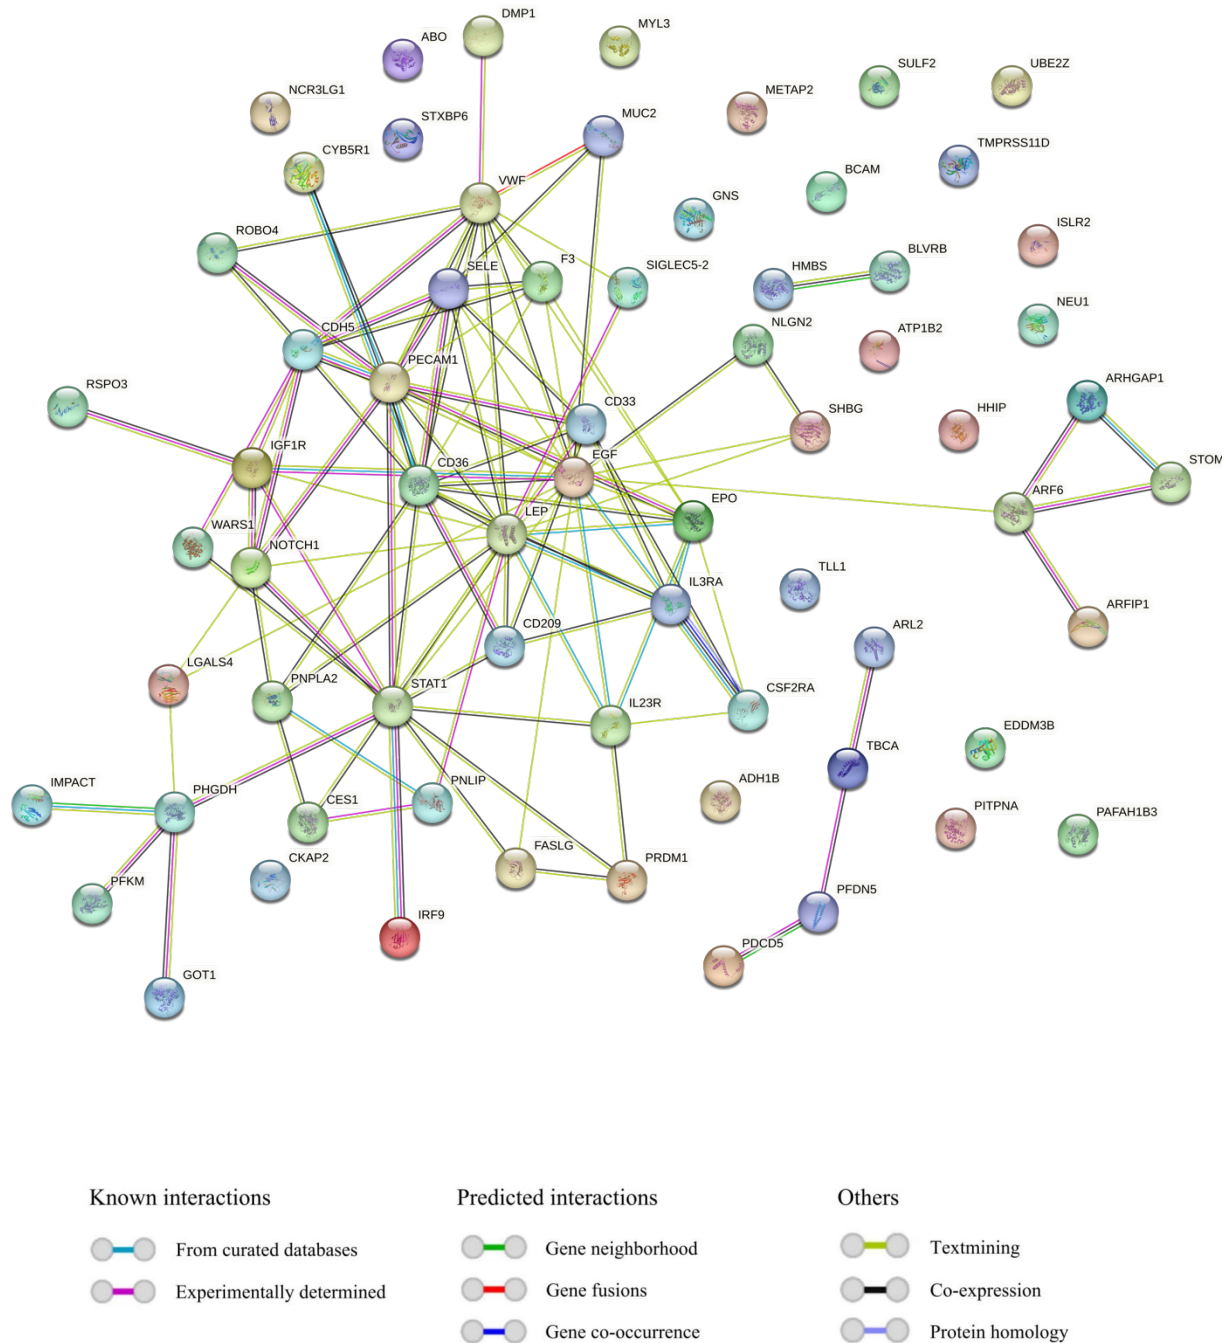

Supplementary Figure 4. Bar plot of the enriched pathway in GO analysis

(A) Enriched pathways of the proteins prioritized by cis-only MR. (B) Enriched pathways of the proteins prioritized by cis+trans MR.

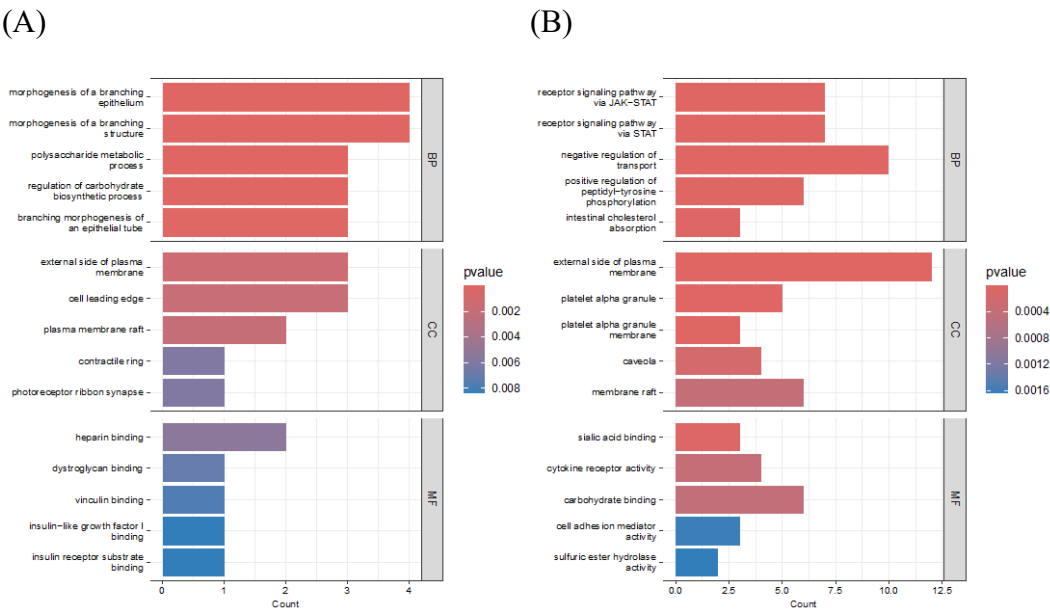

Supplementary Figure 5. Bar plot of the enriched pathway in KEGG analysis

(A) Enriched pathways of the proteins prioritized by cis-only MR. (B) Enriched pathways of the proteins prioritized by cis+trans MR.

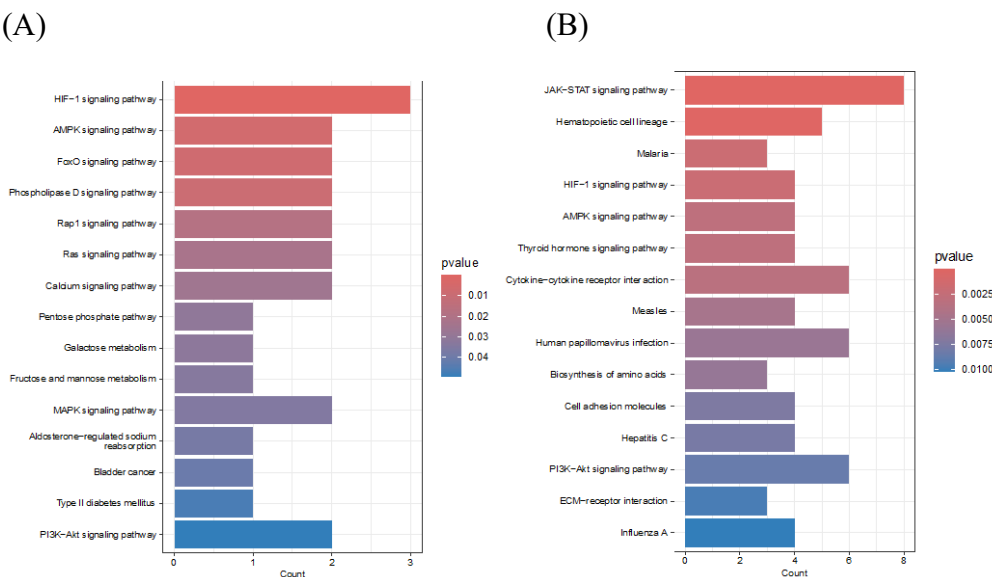

Supplement: Supplementary file 2 [file 1]
